# Supplementary material
Source: Royal Society of Chemistry journal article supplement (doi:10.1039/d6cp01024e)
Supplement: d6cp01024e1.pdf [file d6cp01024e1.pdf]

## Supporting Information

# Synthesis and Structural Characterization of a Nonaromatic Dithia-di-2,6-naphthioctaphyrin(1.0.0.1.1.0.0.1)

Hao Chen\*, Jiaxin Ding, Yirong Tang, and Zongqi Zhang\*

School of Materials Engineering, Suzhou University of Technology, Changshu 215500, China.

\*Corresponding author: Hao Chen (Email: 1902008879@qq.com) ; Zongqi Zhang (Email: 230198252@aa.seu.edu.cn.).

### Contents

|                                                                                     |    |
|-------------------------------------------------------------------------------------|----|
| 1. General Information.....                                                         | 1  |
| 2. Synthetic Procedures and Compound Characterization Data .....                    | 2  |
| 3. Mass and NMR spectra.....                                                        | 5  |
| 4. Absorption and Emission Spectra.....                                             | 11 |
| 5. Single Crystal X-ray Structure Analysis.....                                     | 14 |
| 6. DFT Calculations.....                                                            | 17 |
| 7. Supporting References.....                                                       | 18 |
| Appendix: Cartesian Coordinates of All Molecules for Theoretical Calculations ..... | 19 |

## 1. General Information

**Materials:** All reagents and solvents were purchased from Energy Chemical, Macklin, Adamas-beta®, TCI, Sigma-Aldrich and Innochem, and were used without further purification except where noted. Thin-layer chromatographic (TLC) analyses were carried out using pre-coated, glass-backed silica gel plates. Alumina column chromatography was performed on Merck deactivated Brockmann III neutral alumina oxide. Silica gel column chromatography was performed on Qingdao Haiyang silica gel of mesh size 200-300.

**Instrumentation:** All NMR spectra were acquired on either a Bruker 400 MHz instrument or a Bruker 500 MHz NMR spectrometer. <sup>1</sup>H NMR Chemical shifts are reported in ppm relative to TMS ( $\delta$  0.00) or residual solvent signals as the internal reference standards (CDCl<sub>3</sub>  $\delta$  = 7.26). Multiplicities were given as: s (singlet), d (doublet), t (triplet), q (quartet), and m (multiplet). The number of protons (n) for a given resonance is indicated by nH. Coupling constants are reported as *J* values in Hz. <sup>13</sup>C{<sup>1</sup>H} NMR spectra were obtained at 100 MHz on the 400 MHz NMR instruments noted above. Chemical shifts were recorded relative to the solvent resonance (CDCl<sub>3</sub>;  $\delta$  77.16). High-resolution mass spectrometric (HRMS) data were acquired on a Waters G2 XS mass spectrometer. UV–Vis–NIR spectra were recorded on a Varian Cary 5000 spectrophotometer.

**Computational Detail:** All calculations were carried out using the Gaussian 16 program<sup>1</sup>. Initial geometry of **1** was obtained from the X-ray diffraction coordinates. Geometry optimizations in the ground state (S<sub>0</sub>) were performed by the density functional theory (DFT) method with Becke's three-parameter hybrid exchange functionals. The time-dependent DFT (TD-DFT) method at the B3LYP/6-311G(d,p) level was employed to simulate the optical absorption properties of the macrocycle.

**X-ray Crystal Structure Analysis:** Single crystals of **1** were grown by slow diffusion of *n*-hexane into CHCl<sub>3</sub> solutions of the species in question at room temperature. The X-ray diffraction data for **1** was collected in Bruker D8 Venture diffractometer with a PHOTON III detector and a  $\mu$ -focus CuK $\alpha$  radiation source ( $\lambda$  = 1.5418 Å), or GaK $\alpha$  radiation ( $\lambda$  = 1.34139 Å). The crystal was kept at 215.0 K during data collection. The crystal structure data have been deposited in the Cambridge Crystallographic Data Centre with reference no. CCDC 2521026 [1]

## 2. Synthetic Procedures and Compound Characterization Data

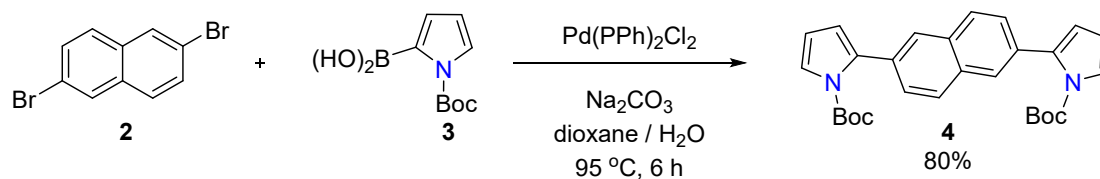

**Compound 4.** To a 250 mL round-bottom flask maintained under a nitrogen atmosphere was added a mixture of 2,6-dibromonaphthalene **2** (866.5 mg, 3.0 mmol), *N*-Boc-2-pyrroleboronic acid **3** (1.60 g, 7.6 mmol), bis(triphenylphosphine)palladium(II) chloride (210.6 mg, 0.30 mmol), and Na<sub>2</sub>CO<sub>3</sub> (634.0 mg, 6.0 mmol) in 1,4-dioxane (50 mL) and water (3 mL). The reaction mixture was stirred at 95 °C in an oil bath for 6 h. After completion, the solvent was removed under reduced pressure, and the resulting dark residue was extracted with ethyl acetate and water (3×). The combined organic layers were concentrated under reduced pressure, and the crude product was purified by silica gel column chromatography using dichloromethane as the eluent. The solvent was evaporated under reduced pressure, and the residue was washed with methanol to afford compound **4** as an off-white solid (1.10 g, 80%). <sup>1</sup>H NMR (400 MHz, Chloroform-*d*) δ 7.82 – 7.75 (m, 4H), 7.46 (dd, *J* = 8.4, 1.6 Hz, 2H), 7.41 (dd, *J* = 3.2, 1.9 Hz, 2H), 6.28 (dt, *J* = 6.5, 3.3 Hz, 4H), 1.32 (s, 18H). <sup>13</sup>C{<sup>1</sup>H} NMR (101 MHz, Chloroform-*d*) δ 149.58, 135.10, 132.13, 132.08, 128.27, 127.13, 126.87, 122.96, 115.06, 110.89, 83.87, 27.76.

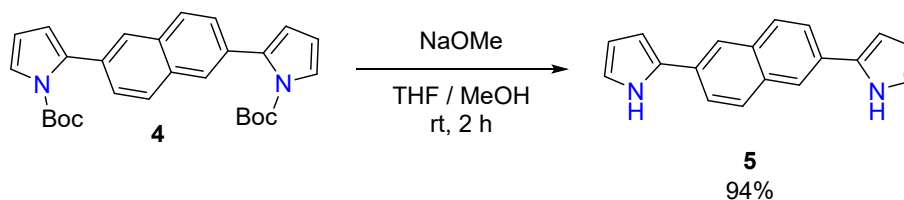

**Compound 5.** To a 100 mL round-bottom flask, a methanol–THF (1:10, v/v; 20 mL total volume) solution of compound **4** (1.00 g, 2.2 mmol) was treated with NaOMe (1.00 g, 18.5 mmol) at room temperature and stirred for 3 h. The progress of the reaction was monitored by TLC, which showed complete consumption of the starting material, indicating smooth deprotection. Upon completion, the reaction mixture was poured into water (200 mL). The resulting precipitate was collected by filtration and washed with methanol to afford compound **5** as a grayish-white solid (534.2 mg, 94%). <sup>1</sup>H NMR (400 MHz, DMSO-*d*<sub>6</sub>) δ 11.44 (s, 2H), 8.03 (s, 2H), 7.79 (s, 4H), 7.00 – 6.82 (m, 2H), 6.64 (s, 2H), 6.26 – 6.09 (m, 2H). <sup>13</sup>C{<sup>1</sup>H} NMR (101 MHz, DMSO-*d*<sub>6</sub>) δ 131.78, 131.21, 129.72, 127.87, 123.60, 120.22, 119.75, 109.33, 106.22.

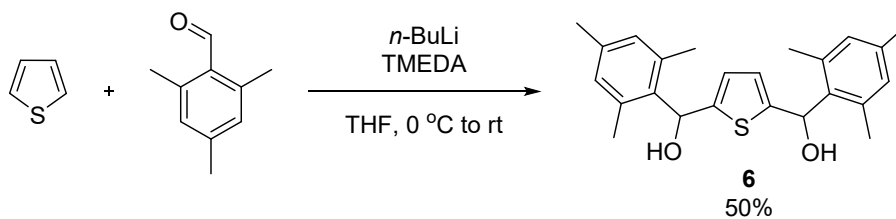

**Compound 6.** To a 100 mL round-bottomed flask equipped with a magnetic stir bar were added thiophene (562.8  $\mu$ L, 7.13 mmol) and dry THF (25 mL). The reaction mixture was stirred under an inert atmosphere, after which *N,N,N',N'*-tetramethylethylenediamine (TMEDA, 3.20 mL, 21.0 mmol) was added and the mixture was stirred at room temperature for 5 min. *n*-BuLi in hexane (1.6 M, 13.04 mL, 21.0 mmol) was then added dropwise via syringe. The reaction mixture was stirred at room temperature for 1 h and subsequently heated in an oil bath at 66  $^{\circ}$ C for an additional 1 h. The mixture was allowed to cool to room temperature and then to 0  $^{\circ}$ C. At this temperature, mesitaldehyde (2.51 mL, 17.0 mmol) was added dropwise, and the reaction mixture was stirred at room temperature for 2 h. The reaction was quenched with saturated aqueous  $\text{NH}_4\text{Cl}$  solution, and the product was extracted with ethyl acetate. The combined organic layers were dried over anhydrous  $\text{Na}_2\text{SO}_4$  and concentrated under reduced pressure. The crude product was purified by silica gel column chromatography using petroleum ether/ethyl acetate (10:1, v/v) as the eluent, concentrated under reduced pressure, and washed with methanol to afford compound **6** as a white solid (1.36 g, 50%).  $^1\text{H}$  NMR (400 MHz,  $\text{DMSO-}d_6$ )  $\delta$  6.78 (s, 4H), 6.29 (s, 2H), 6.15 (d,  $J = 4.3$  Hz, 2H), 5.88 (d,  $J = 4.3$  Hz, 2H), 2.22 (s, 12H), 2.20 (s, 6H).  $^{13}\text{C}\{^1\text{H}\}$  NMR (101 MHz,  $\text{DMSO-}d_6$ )  $\delta$  147.52, 137.32, 136.14, 135.93, 129.44, 121.91, 67.24, 20.49, 20.18.

**Table S1.** Synthetic optimization studies for macrocycle **1**.

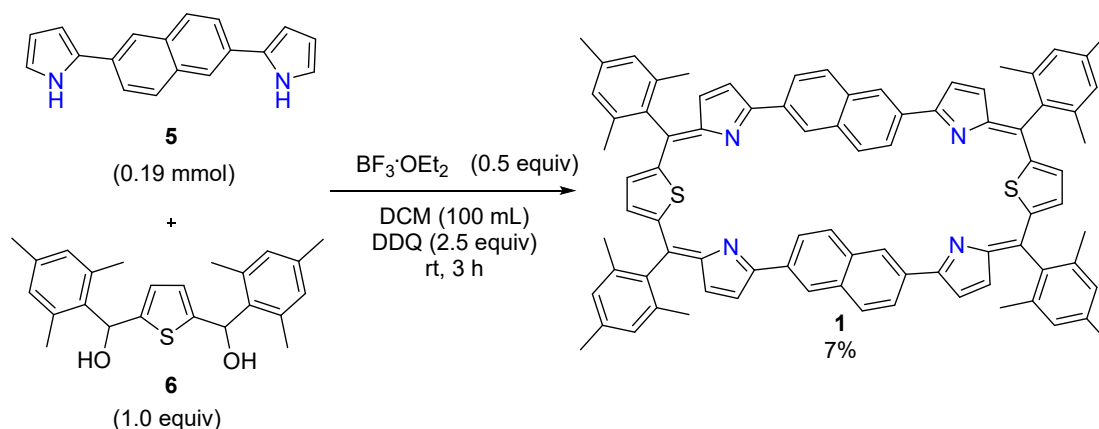

| entry | variation from the standard conditions                              | yield (%) <sup>a</sup> |
|-------|---------------------------------------------------------------------|------------------------|
| 1     | none                                                                | 7                      |
| 2     | 1.3 equiv of compound <b>6</b> instead of 1.0 equiv                 | 7                      |
| 3     | 0.5 equiv of TFA instead of BF <sub>3</sub> ·OEt <sub>2</sub>       | 5                      |
| 4     | 0.5 equiv of MSA instead of BF <sub>3</sub> ·OEt <sub>2</sub>       | 5                      |
| 5     | 0.5 equiv of PTSA instead of BF <sub>3</sub> ·OEt <sub>2</sub>      | nd                     |
| 6     | 1.0 equiv of BF <sub>3</sub> ·OEt <sub>2</sub> instead of 0.5 equiv | nd                     |
| 7     | 1.5 equiv of DDQ instead of 2.5 equiv                               | 7                      |
| 8     | 2.5 equiv of TCQ instead of DDQ                                     | nd                     |
| 9     | reaction time 12 h instead of 3 h                                   | 7                      |
| 10    | 200 mL of DCM instead of 100 mL                                     | 7                      |

<sup>a</sup>Isolated yield. <sup>b</sup>nd indicates not determined.

**Compound 1.** In a 250 mL round-bottomed flask, compound **5** (50.0 mg, 0.19 mmol) and compound **6** (72.3 mg, 0.19 mmol) were dissolved in dry CH<sub>2</sub>Cl<sub>2</sub> (100 mL). BF<sub>3</sub>·OEt<sub>2</sub> (12 μL, 0.10 mmol) was then added, and the reaction mixture was stirred at room temperature for 3 h. DDQ (108 mg, 0.475 mmol) was subsequently added, and the mixture was stirred for an additional 1 h under air. Triethylamine (0.50 mL, 3.60 mmol) was then added, and the resulting solution was passed through a short column of neutral alumina. All colored fractions were collected and concentrated under reduced pressure. The crude product was further purified by silica gel column chromatography using CH<sub>2</sub>Cl<sub>2</sub> as the eluent to afford compound **1** as a green solid (8 mg, 7%). <sup>1</sup>H NMR (400 MHz, Chloroform-*d*) δ 8.55 (s, 4H), 7.70 (d, *J* = 8.4 Hz, 4H), 7.51 (d, *J* = 8.5 Hz, 4H), 7.12 (d, *J* = 4.6 Hz, 4H), 6.97 (s, 8H), 6.81 (d, *J* = 4.5 Hz, 4H), 6.70 (s, 4H), 2.37 (s, 12H), 2.19 (s, 24H). HRMS (ESI): *m/z* calculated for C<sub>84</sub>H<sub>69</sub>N<sub>4</sub>S<sub>2</sub> [M+H]<sup>+</sup>: 1197.4959; found: 1197.4971. The <sup>13</sup>C{<sup>1</sup>H} NMR spectra could not be recorded because of the poor solubility of **1** in common organic solvents. This product was further characterized by single crystal X-ray diffraction analysis.

### 3. Mass and NMR spectra

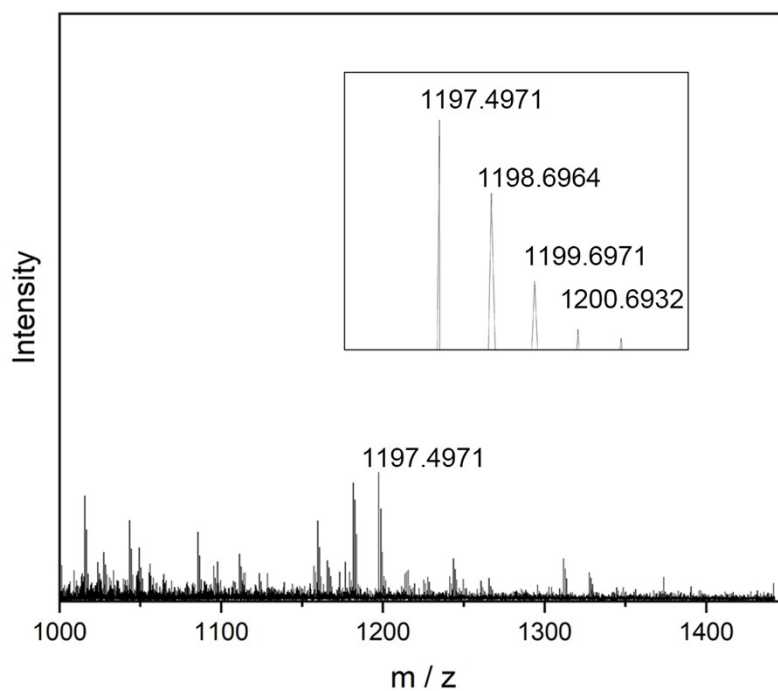

Figure S1. High-resolution mass spectrum of compound **1**.

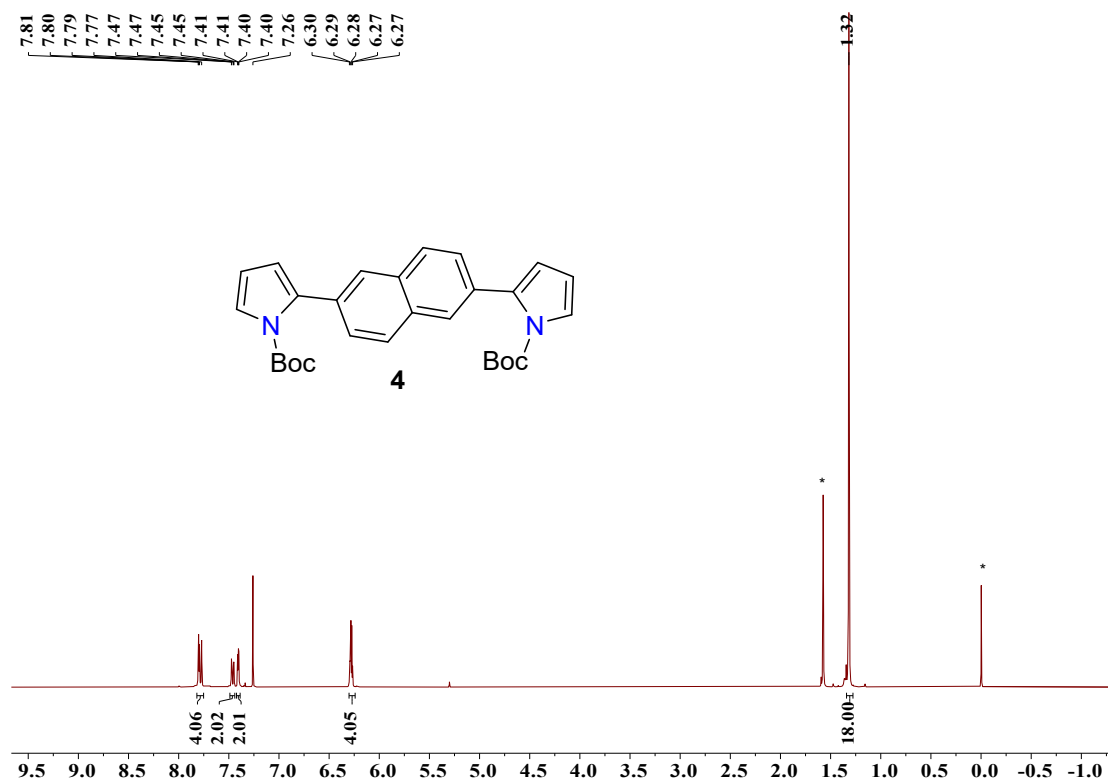

Figure S2.  $^1\text{H}$  NMR spectrum of **4** recorded in  $\text{CDCl}_3$  at 25  $^\circ\text{C}$  (400 MHz). \*Asterisk marks represent water and residual solvents in the sample.

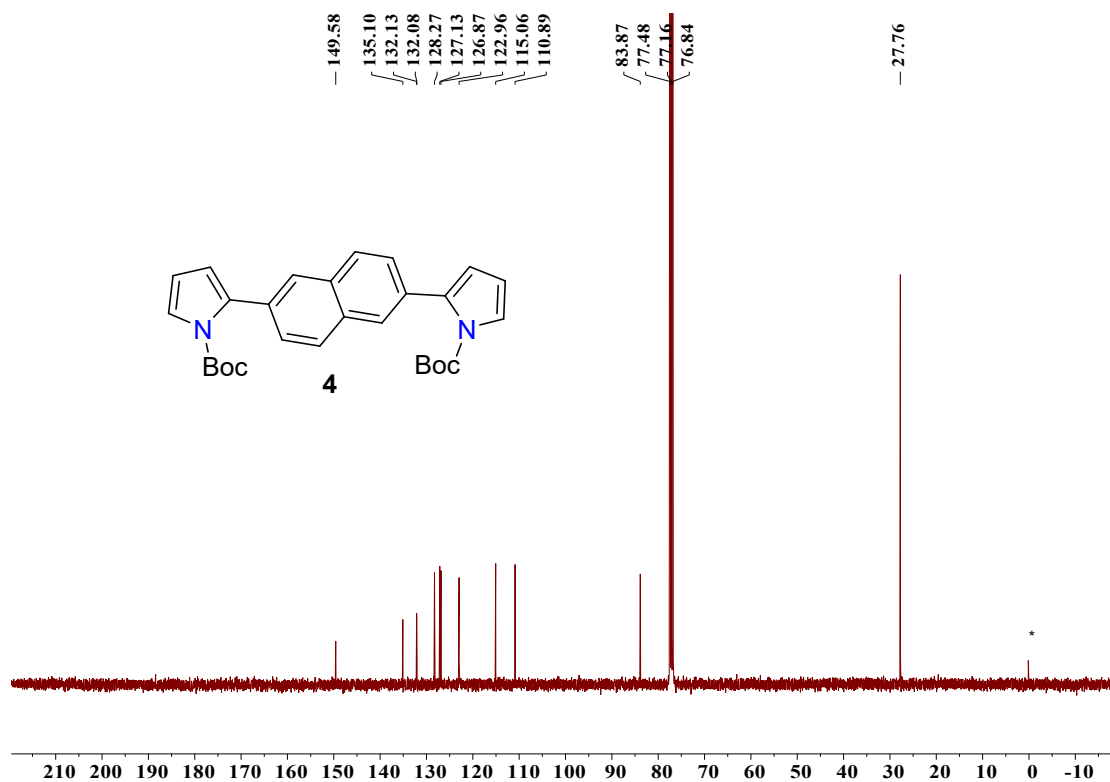

**Figure S3.**  $^{13}\text{C}\{^1\text{H}\}$  NMR spectrum of **4** recorded in  $\text{CDCl}_3$  at 25 °C (400 MHz). \*Asterisk marks represent water and residual solvents in the sample.

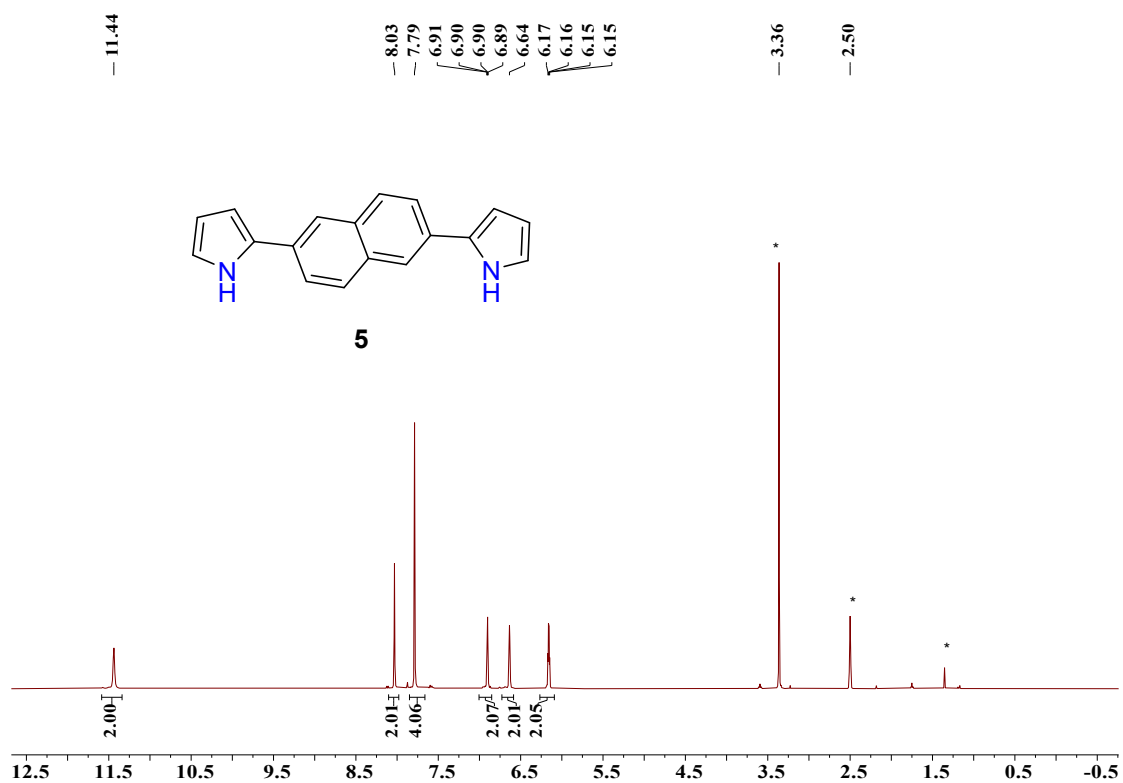

**Figure S4.**  $^1\text{H}$  NMR spectrum of **5** recorded in  $\text{DMSO}-d_6$  at 25 °C (400 MHz). \*Asterisk marks represent water and residual solvents in the sample.



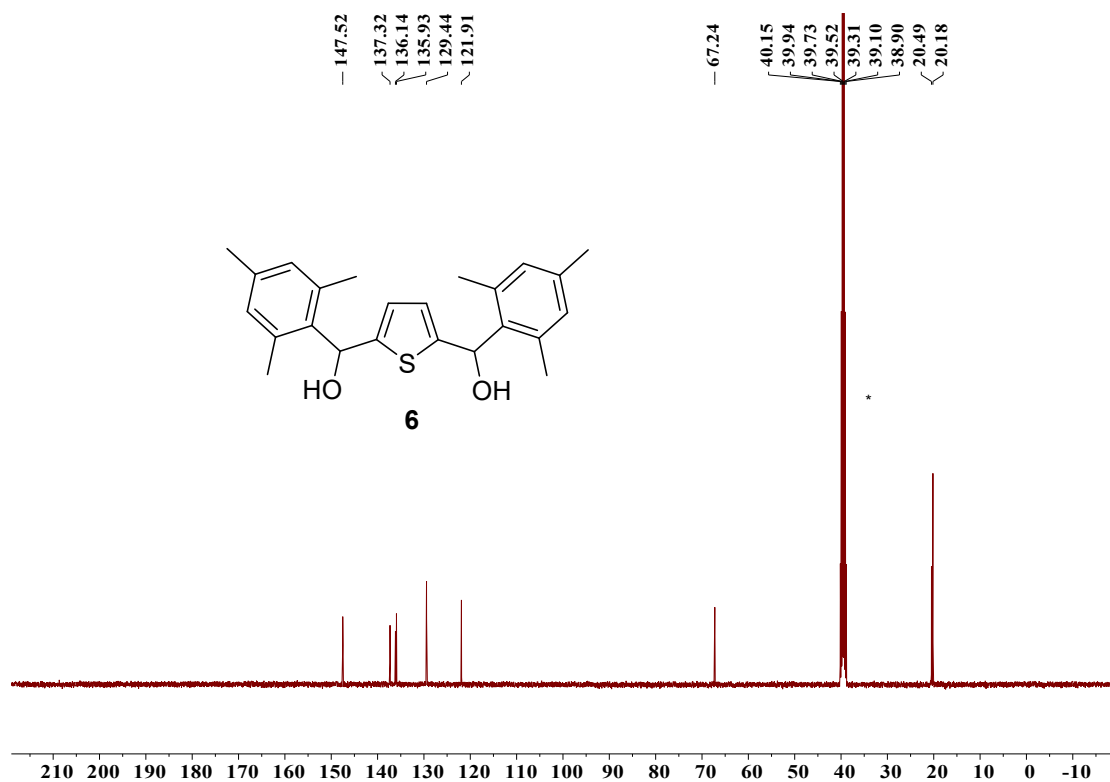

**Figure S7.**  $^{13}\text{C}\{^1\text{H}\}$  NMR spectrum of **6** recorded in  $\text{DMSO-}d_6$  at 25 °C (400 MHz). \*Asterisk marks represent water and residual solvents in the sample.

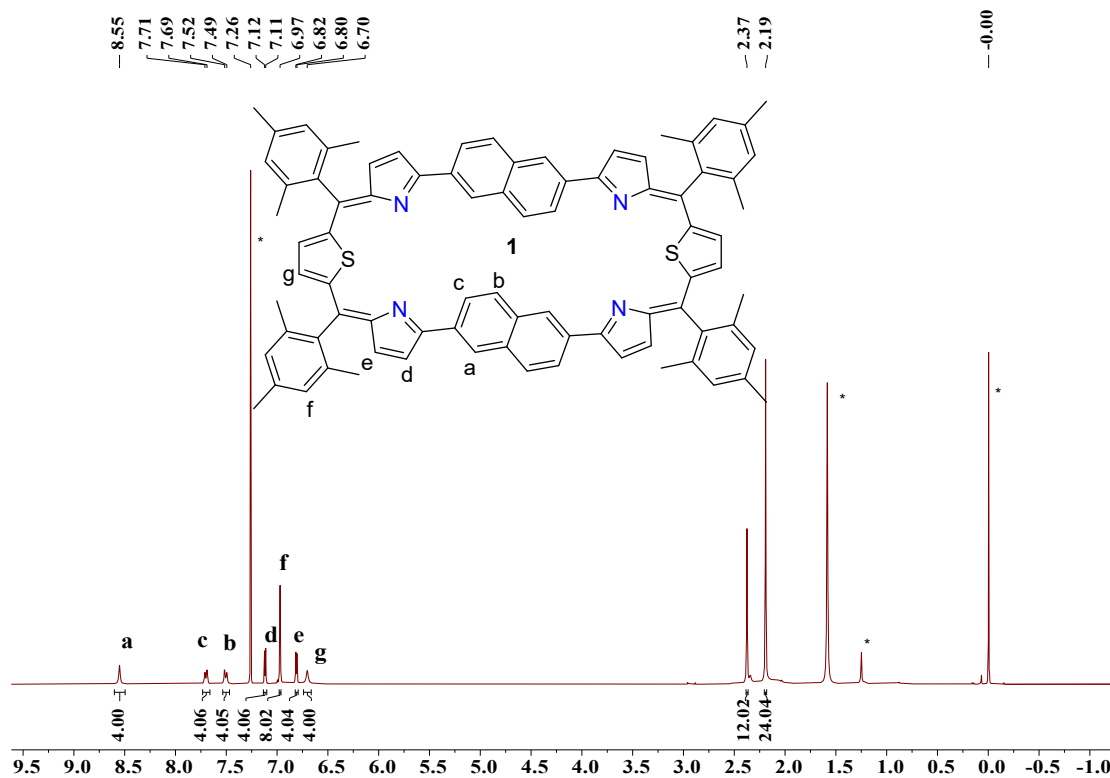

**Figure S8.**  $^1\text{H}$  NMR spectrum of **1** recorded in  $\text{CDCl}_3$  at 25 °C (400 MHz). \*Asterisk marks represent water and residual solvents in the sample.

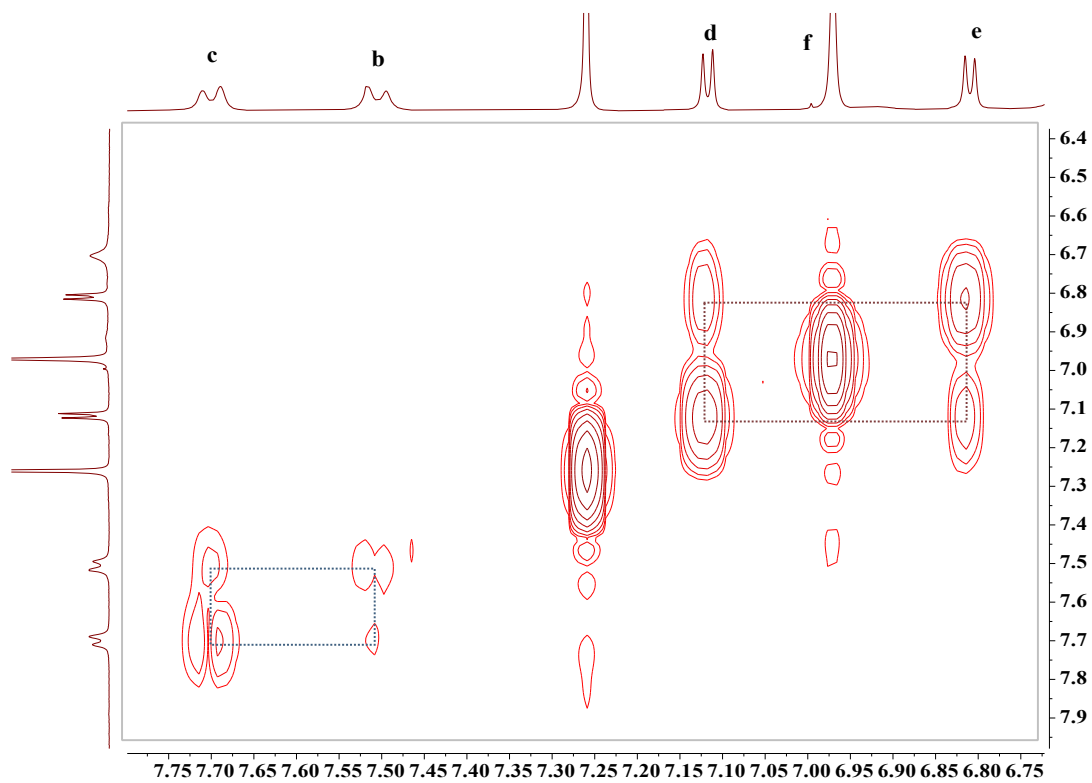

**Figure S9.** COSY spectrum of **1** recorded in  $\text{CDCl}_3$  at 25 °C (400 MHz). \*Asterisk marks represent water and residual solvents in the sample.

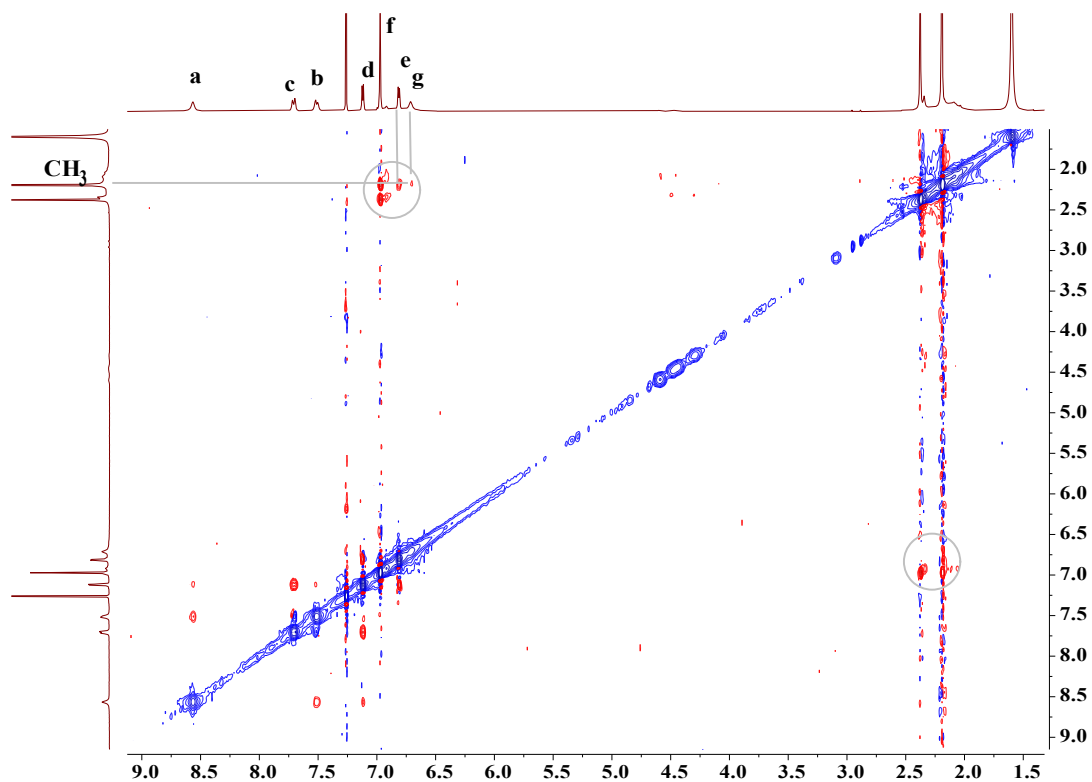

**Figure S10.** ROESY spectrum of **1** recorded in  $\text{CDCl}_3$  at 25 °C (400 MHz). \*Asterisk marks represent water and residual solvents in the sample.

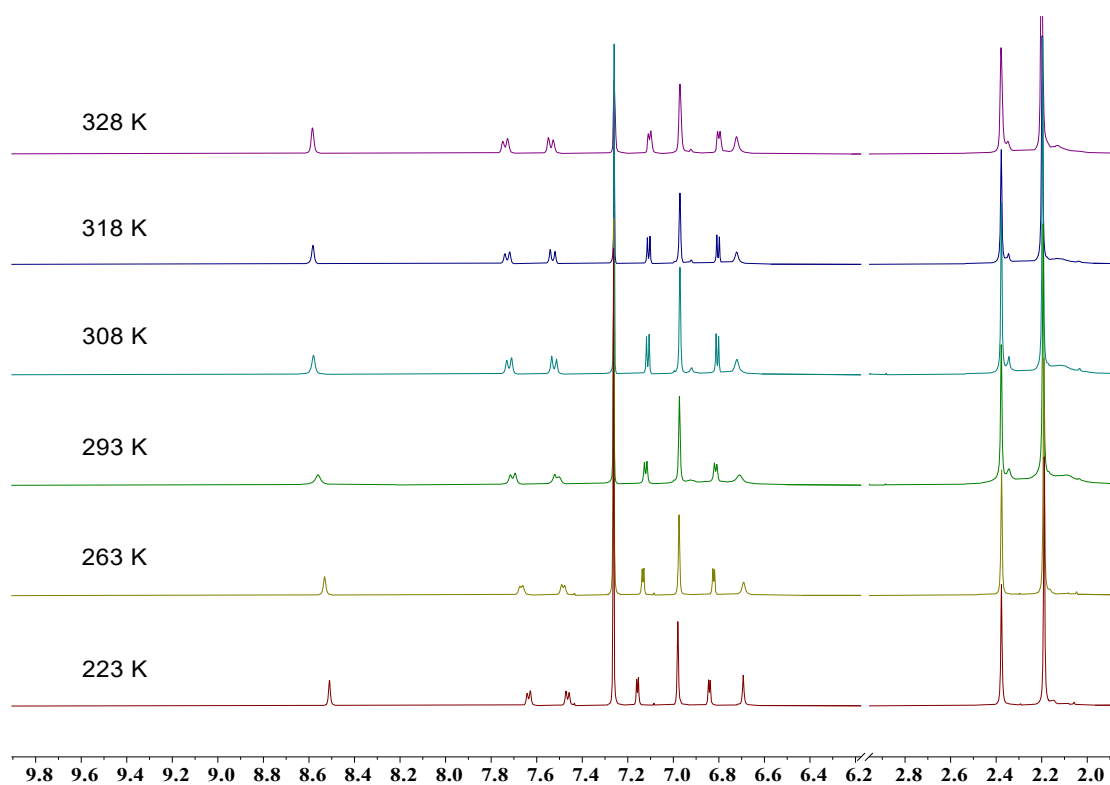

**Figure S11.** Variable-temperature  $^1\text{H}$  NMR spectra of **1** recorded in  $\text{CDCl}_3$  (400 MHz, 223–328 K).

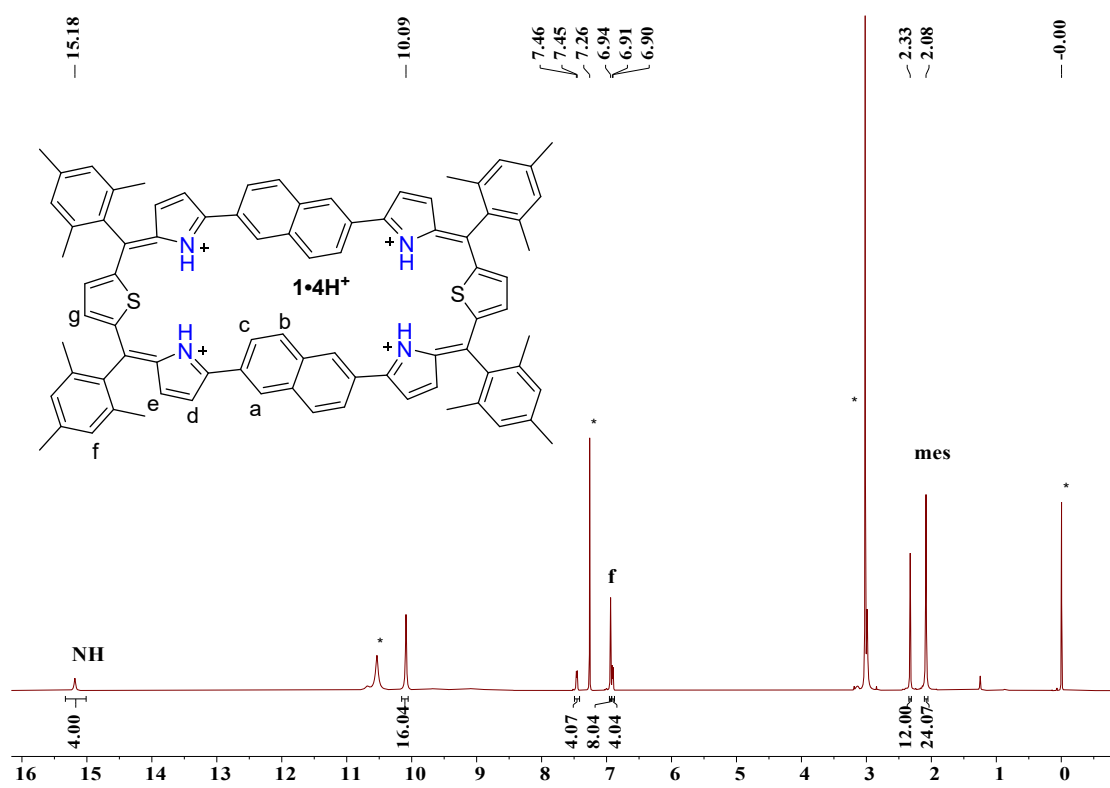

**Figure S12.**  $^1\text{H}$  NMR spectrum of **1** after adding excess amount of MSA recorded in  $\text{CDCl}_3$  at 25 °C (400 MHz). \*Asterisk marks represent water and residual solvents in the sample.

#### 4. Absorption and Emission Spectra

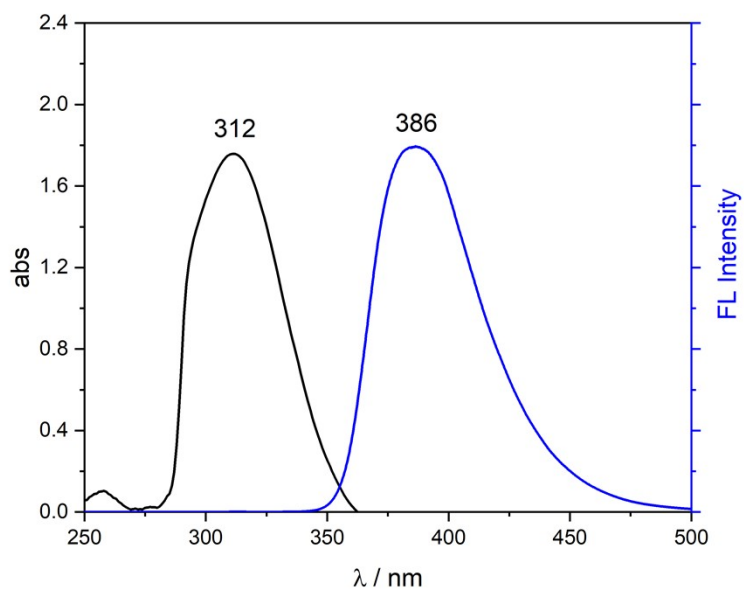

**Figure S13.** UV-Vis absorption and fluorescence spectra ( $\lambda_{\text{ex}} = 311$ ) of **4** ( $8 \times 10^{-5}$  M) recorded in THF at room temperature.

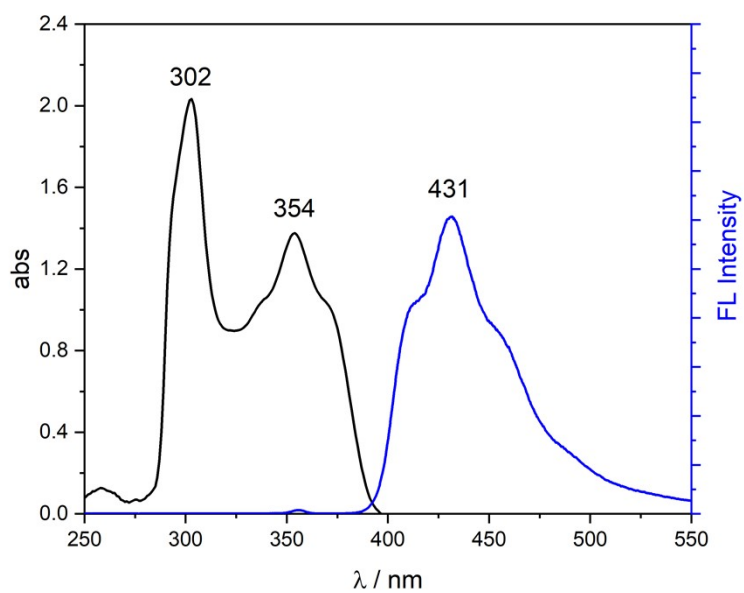

**Figure S14.** UV-Vis absorption and fluorescence spectra ( $\lambda_{\text{ex}} = 354$ ) of **5** ( $8 \times 10^{-5}$  M) recorded in THF at room temperature.

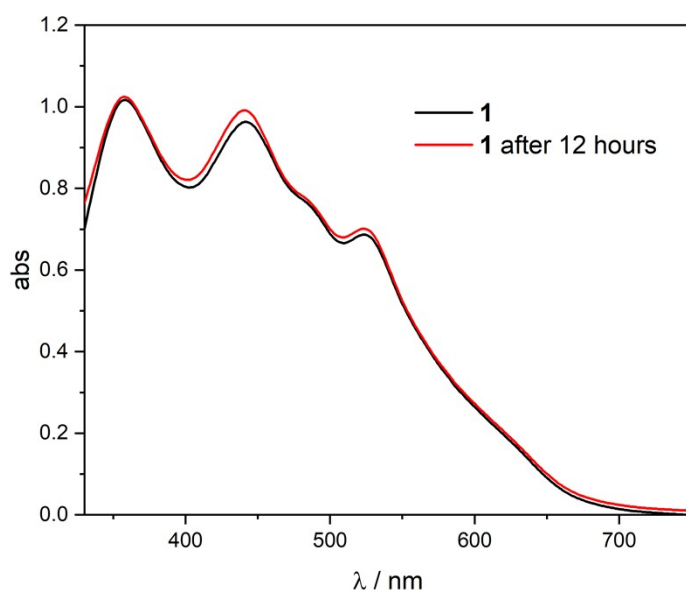

**Figure S15.** UV–Vis absorption spectra of **1** before (black) and after 12 h exposure to air (red) in THF at room temperature.

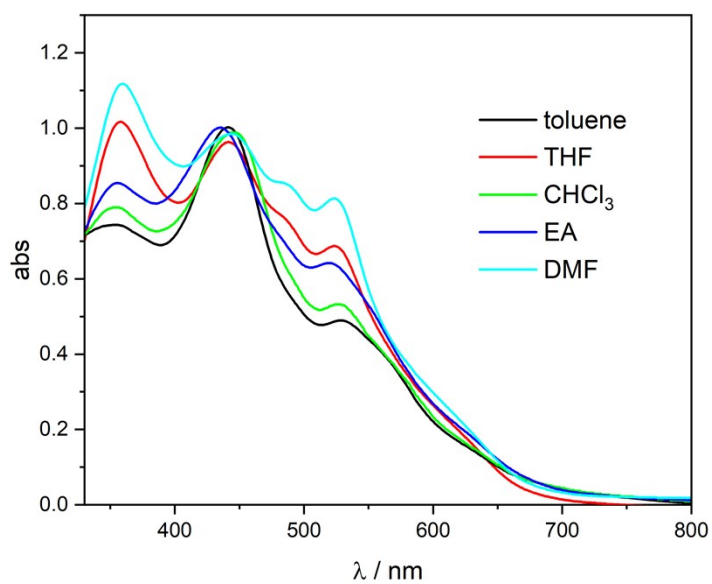

**Figure S16.** UV–Vis absorption spectra of compound **1** ( $1 \times 10^{-5}$  M) recorded in various solvents at room temperature.

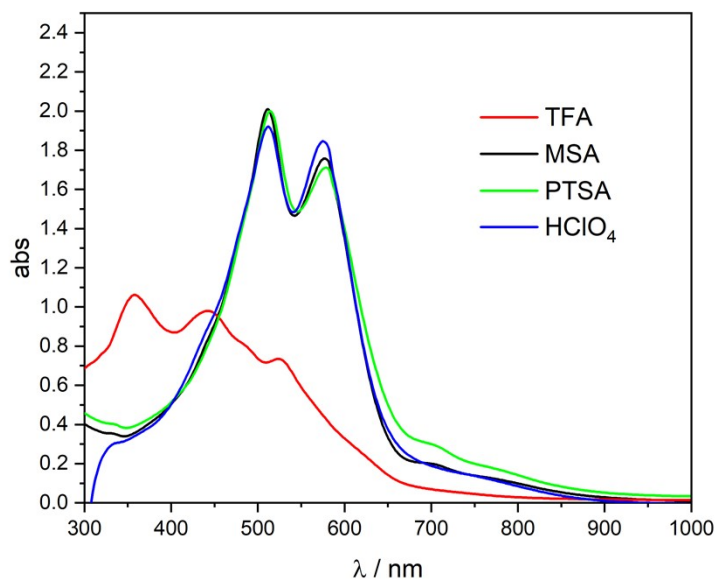

**Figure S17.** UV–Vis absorption spectra of compound **1** ( $1 \times 10^{-5}$  M) after treatment with different acids (excess), recorded in THF at room temperature.

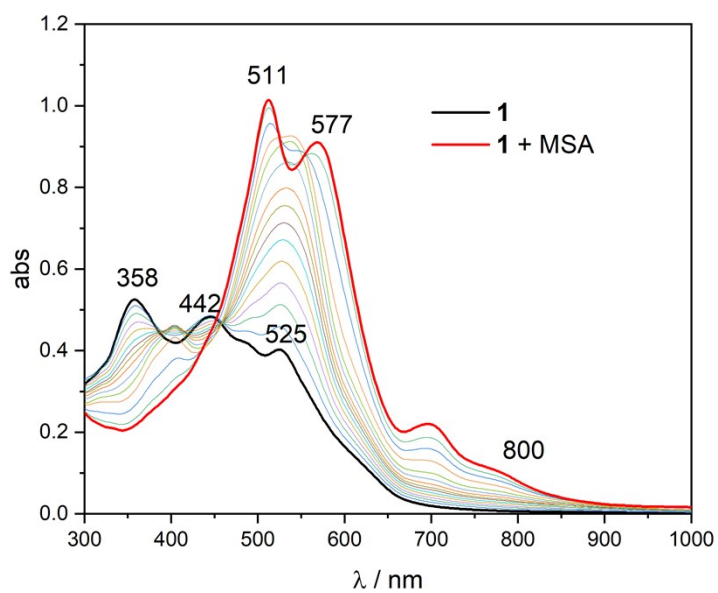

**Figure S18.** UV–Vis absorption spectra of **1** ( $5 \times 10^{-6}$  M) before (black) and after addition of 3000 equiv. of MSA (red) in THF at room temperature.

## 5. Single Crystal X-ray Structure Analysis

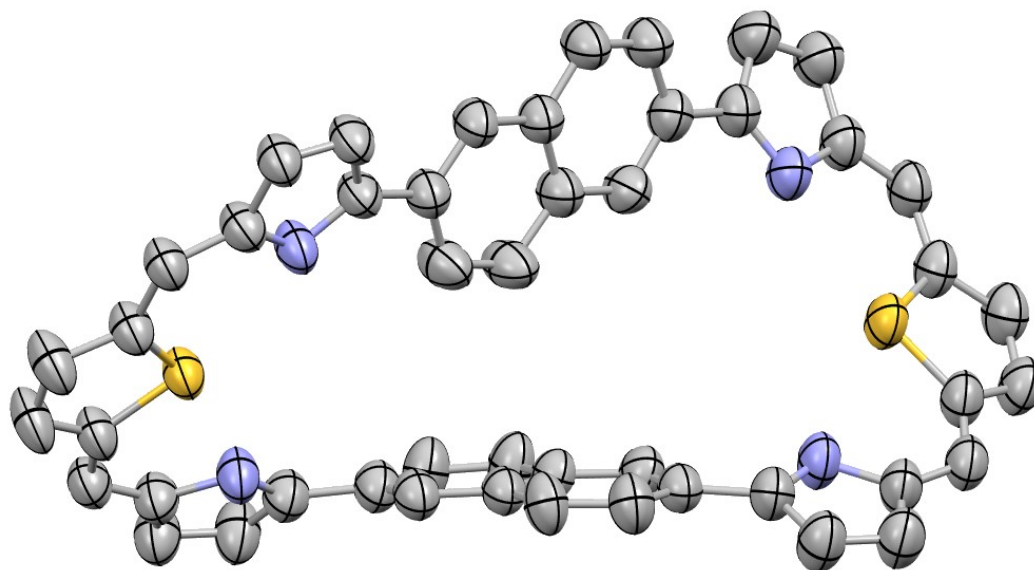

**Figure S19.** ORTEP drawings for **1**, thermal ellipsoids are set at 50% probability. Peripheral alkyl groups and hydrogen atoms have been omitted for clarity.

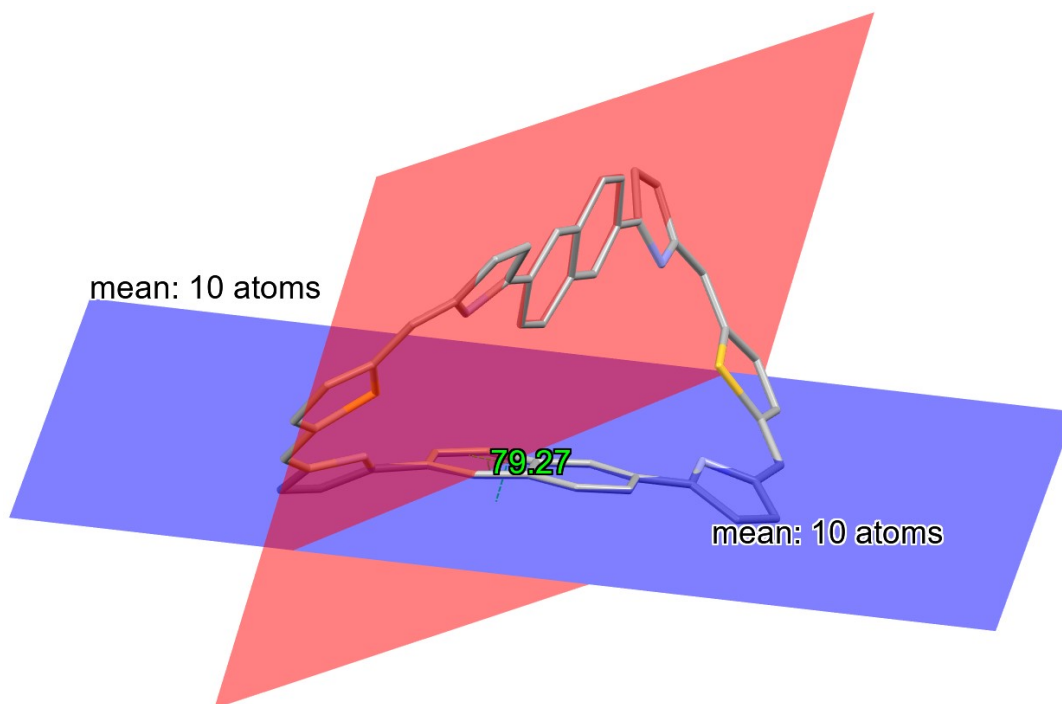

**Figure S20.** Selected dihedral angles ( $^{\circ}$ ) for **1** deduced from the corresponding single crystal X-ray diffraction structure. *Meso*-aryl groups and hydrogens have been omitted for clarity.

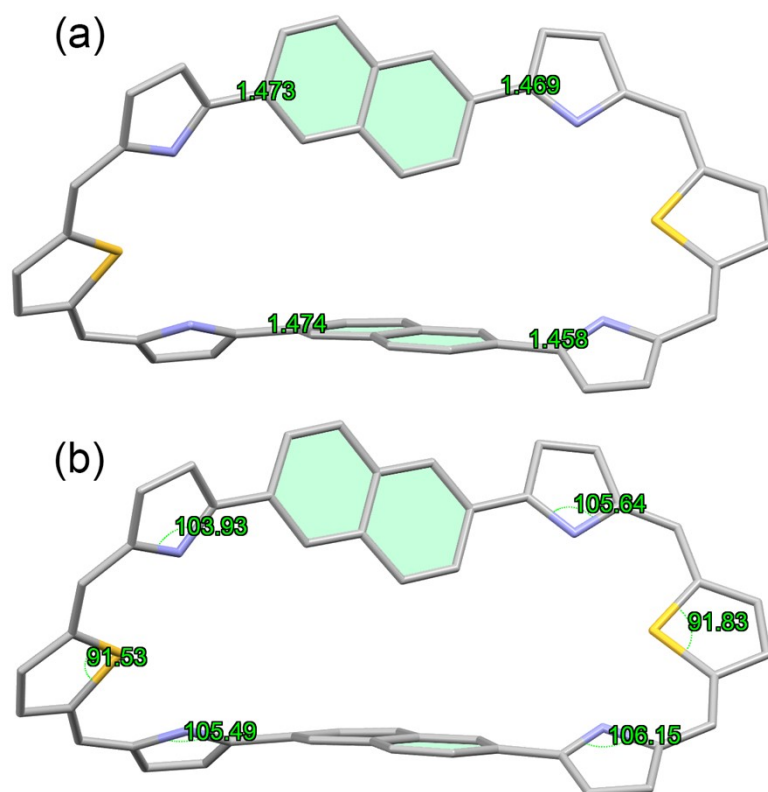

**Figure S21.** Selected bond lengths (a, Å) and bond angles (b, °) for **1** deduced from the corresponding single crystal X-ray diffraction structure. *Meso*-aryl groups and hydrogens have been omitted for clarity.

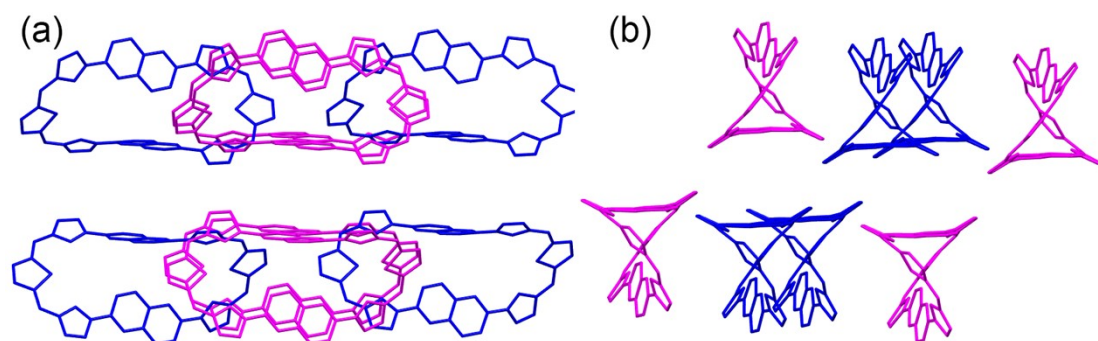

**Figure S22.** X-ray packing structures of **1**. Top view (a) and side view (b). *Meso*-aryl groups and hydrogens have been omitted for clarity.

**Table S2.** Crystal data and structure refinement for compound **1**.

| Empirical formula                      | C <sub>87</sub> H <sub>71</sub> Cl <sub>9</sub> N <sub>4</sub> S <sub>2</sub> |
|----------------------------------------|-------------------------------------------------------------------------------|
| Formula weight                         | 1555.64                                                                       |
| Temperature/K                          | 215                                                                           |
| Crystal system,                        | triclinic                                                                     |
| Space group                            | P -1                                                                          |
| a/Å                                    | 13.5455(5)                                                                    |
| b/Å                                    | 14.0485(5)                                                                    |
| c/Å                                    | 22.4224(8)                                                                    |
| $\alpha$ /°                            | 95.993(2)                                                                     |
| $\beta$ /°                             | 103.731(2)                                                                    |
| $\gamma$ /°                            | 94.466(2)                                                                     |
| Volume/Å <sup>3</sup>                  | 4098.9(3)                                                                     |
| Z                                      | 2                                                                             |
| $\rho_{\text{calc}}$ g/cm <sup>3</sup> | 1.260                                                                         |
| $\mu$ /mm <sup>-1</sup>                | 3.643                                                                         |
| F(000)                                 | 1612.0                                                                        |
| Crystal size/mm <sup>3</sup>           | 0.38 × 0.35 × 0.21                                                            |
| Radiation                              | CuK $\alpha$ ( $\lambda$ = 1.54178)                                           |
| 2 $\theta$ range for data collection/° | 3.181 to 66.274                                                               |
| Limiting indices                       | -16 ≤ h ≤ 16, -16 ≤ k ≤ 16, -26 ≤ l ≤ 26                                      |
| Reflections collected                  | 14677                                                                         |
| Independent reflections                | 14677                                                                         |
| R(reflections)                         | 0.0728                                                                        |
| wR2(reflections)                       | 0.2413                                                                        |

## 6. DFT Calculations

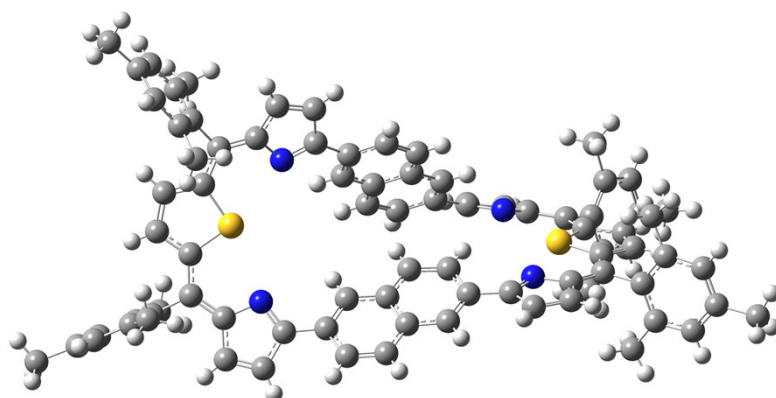

Figure S23. Optimized structures of **1**.

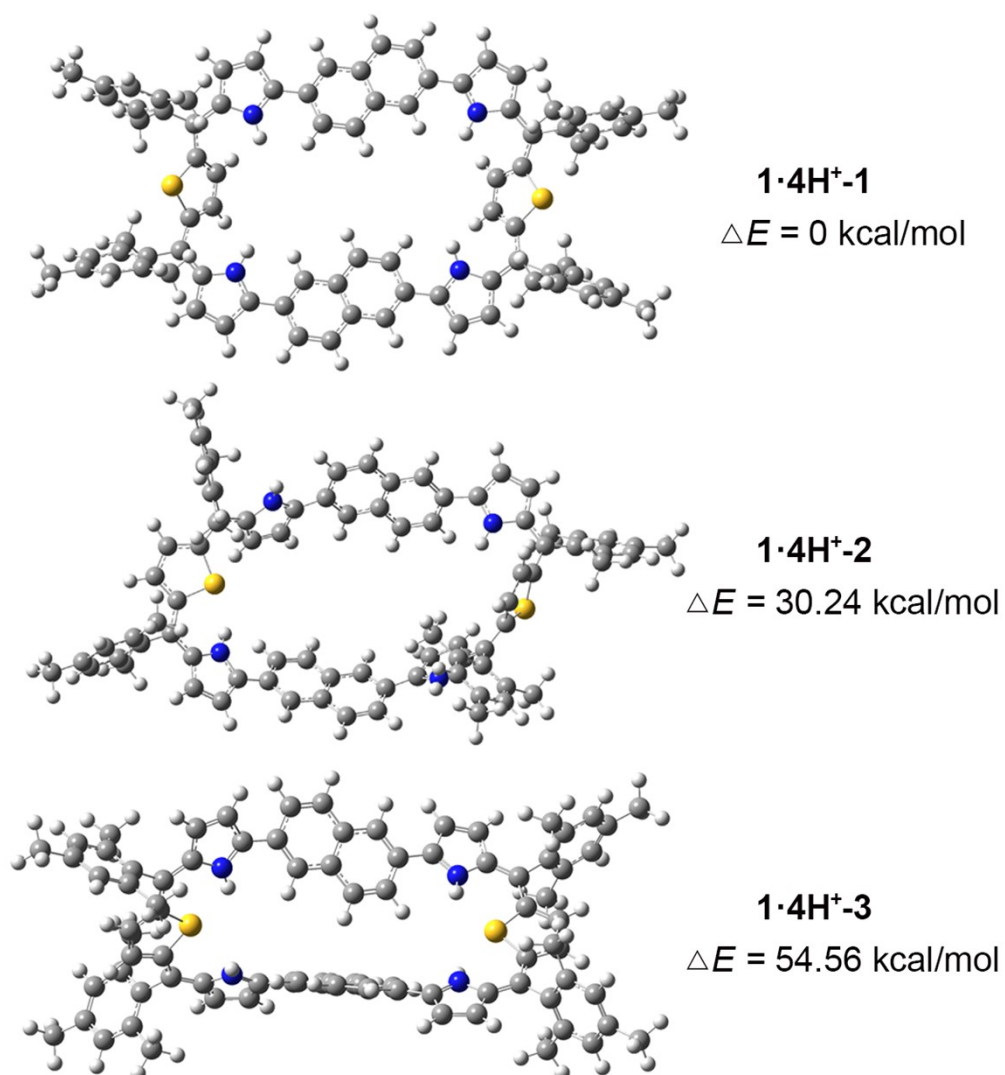

Figure S24. Geometries and calculated energies for selected conformers of **1·4H<sup>+</sup>**. Note: The conformer of **1·4H<sup>+</sup>** with inversion of the thiophene rings (**1·4H<sup>+</sup>-1**) is energetically more stable.

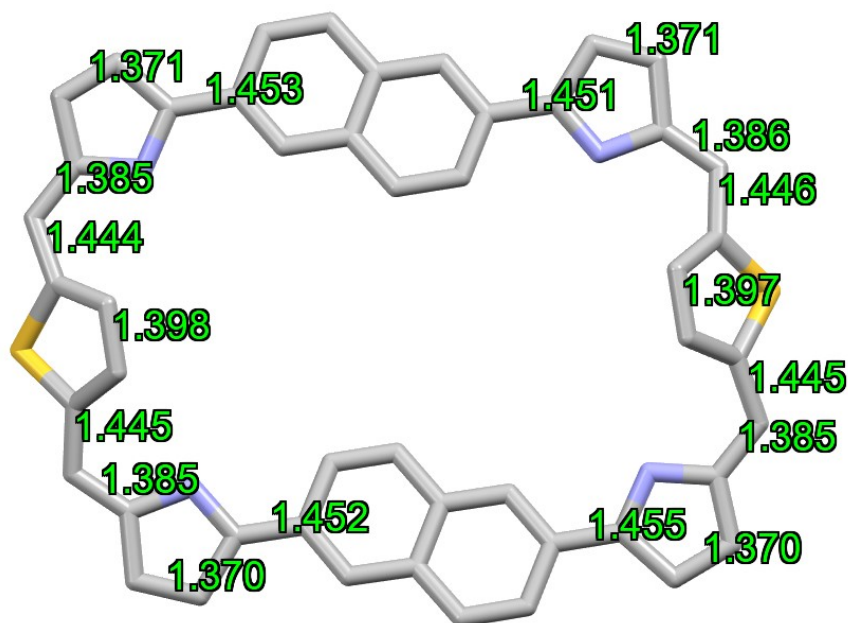

**Figure S25.** Selected bond lengths (a, Å) for  $1\cdot 4H^+(1\cdot 4H^+-1)$  obtained from the corresponding DFT-optimized structure. Meso-aryl groups and hydrogen atoms have been omitted for clarity.

## 7. Supporting References

(1) Frisch, M. J.; Trucks, G. W.; Schlegel, H. B.; Scuseria, G. E.; Robb, M. A.; Cheeseman, J. R.; Scalmani, G.; Barone, V.; Petersson, G. A.; Nakatsuji, H.; Li, X.; Caricato, M.; Marenich, A. V.; Bloino, J.; Janesko, B. G.; Gomperts, R.; Mennucci, B.; Hratchian, H. P.; Ortiz, J. V.; Izmaylov, A. F.; Sonnenberg, J. L.; Williams; Ding, F.; Lipparini, F.; Egidi, F.; Goings, J.; Peng, B.; Petrone, A.; Henderson, T.; Ranasinghe, D.; Zakrzewski, V. G.; Gao, J.; Rega, N.; Zheng, G.; Liang, W.; Hada, M.; Ehara, M.; Toyota, K.; Fukuda, R.; Hasegawa, J.; Ishida, M.; Nakajima, T.; Honda, Y.; Kitao, O.; Nakai, H.; Vreven, T.; Throssell, K.; Montgomery Jr., J. A.; Peralta, J. E.; Ogliaro, F.; Bearpark, M. J.; Heyd, J. J.; Brothers, E. N.; Kudin, K. N.; Staroverov, V. N.; Keith, T. A.; Kobayashi, R.; Normand, J.; Raghavachari, K.; Rendell, A. P.; Burant, J. C.; Iyengar, S. S.; Tomasi, J.; Cossi, M.; Millam, J. M.; Klene, M.; Adamo, C.; Cammi, R.; Ochterski, J. W.; Martin, R. L.; Morokuma, K.; Farkas, O.; Foresman, J. B.; Fox, D. J. *Gaussian 16 Rev. C.01*, Wallingford, CT, 2016.

**Appendix: Cartesian Coordinates of All Molecules for Theoretical Calculations****Table S3.** Optimized coordinates of **1**.

\* Sum of imaginary frequencies = 0

| atom | X       | Y       | Z       |
|------|---------|---------|---------|
| S    | -3.7928 | 6.8242  | 15.9585 |
| S    | 5.3649  | -0.7702 | 15.9946 |
| N    | -3.2355 | 5.1168  | 18.1603 |
| N    | -1.9456 | 6.8618  | 13.8911 |
| N    | 5.3273  | 1.0488  | 18.1657 |
| N    | 3.1196  | -0.8923 | 14.1961 |
| C    | -1.2407 | 3.8637  | 18.8029 |
| C    | 5.7287  | -1.986  | 14.8244 |
| C    | -0.1643 | 2.9931  | 13.8277 |
| C    | -2.6228 | 4.3176  | 19.0096 |
| C    | -5.1893 | 6.9811  | 16.9655 |
| C    | -4.6447 | 4.6259  | 19.9499 |
| H    | -5.4026 | 4.6006  | 20.5052 |
| C    | -0.8812 | 1.7908  | 13.9416 |
| H    | -1.82   | 1.8177  | 13.9916 |
| C    | 1.152   | 0.5131  | 13.9559 |
| C    | -4.3443 | 8.0767  | 14.9046 |
| C    | -3.4792 | 3.9813  | 20.1385 |
| H    | -3.2598 | 3.4213  | 20.8608 |
| C    | 4.7165  | -2.6845 | 14.0874 |
| C    | -3.5577 | 8.6545  | 13.8476 |
| C    | 0.8588  | 3.0346  | 19.7109 |
| C    | -6.65   | 6.5729  | 18.9411 |
| C    | -2.383  | 8.1031  | 13.4278 |
| C    | -0.485  | 3.4571  | 19.868  |
| H    | -0.8668 | 3.4576  | 20.7268 |
| C    | 1.2697  | 2.9234  | 13.8031 |
| C    | 5.1055  | -4.0218 | 13.5162 |
| C    | 1.8503  | -0.7843 | 13.9047 |
| C    | -0.0598 | 5.397   | 13.5279 |
| C    | 7.0999  | 1.5792  | 19.5917 |
| H    | 7.9684  | 1.6443  | 19.9444 |
| C    | 3.5121  | 2.2036  | 19.3311 |
| C    | -5.3997 | 6.2416  | 18.17   |
| C    | 7.4959  | 0.0944  | 17.6005 |
| C    | -4.4924 | 5.3676  | 18.7175 |
| C    | -4.0532 | 9.9332  | 13.2457 |
| C    | 4.9143  | 1.779   | 19.1794 |

|   |         |         |         |
|---|---------|---------|---------|
| C | 2.9641  | 2.3226  | 20.624  |
| H | 3.5021  | 2.1368  | 21.3725 |
| C | -5.5881 | 8.5411  | 15.314  |
| H | -6.0623 | 9.2135  | 14.8582 |
| C | -4.3326 | 12.3022 | 13.3284 |
| H | -4.1853 | 13.1258 | 13.7571 |
| C | -0.7828 | 4.2429  | 13.7145 |
| H | -1.7194 | 4.2943  | 13.7679 |
| C | -3.8343 | 11.1381 | 13.9215 |
| C | 1.6617  | 2.7025  | 20.807  |
| H | 1.3048  | 2.7407  | 21.6756 |
| C | 6.698   | 0.882   | 18.4075 |
| C | -1.3822 | 8.6585  | 12.5355 |
| H | -1.4365 | 9.473   | 12.0702 |
| C | -5.029  | 12.287  | 12.1445 |
| C | -0.7652 | 6.6595  | 13.3375 |
| C | -0.243  | 0.5841  | 13.9809 |
| H | -0.7477 | -0.2072 | 14.0255 |
| C | 1.3539  | 5.3237  | 13.4991 |
| H | 1.8592  | 6.1079  | 13.3826 |
| C | 1.8868  | 1.6705  | 13.8859 |
| H | 2.826   | 1.6197  | 13.8933 |
| C | 1.4049  | 2.9767  | 18.4012 |
| C | -6.0654 | 7.9232  | 16.4552 |
| H | -6.8974 | 8.1225  | 16.8442 |
| C | 2.7139  | 2.5055  | 18.2415 |
| H | 3.059   | 2.392   | 17.3745 |
| C | 9.8704  | 0.8557  | 17.3211 |
| C | 8.9651  | -0.0292 | 17.8993 |
| C | 7.0852  | -2.2603 | 14.7894 |
| H | 7.4766  | -2.8733 | 14.194  |
| C | -7.8482 | 5.9281  | 18.6283 |
| C | -0.6656 | 3.8587  | 17.5279 |
| H | -1.1645 | 4.1746  | 16.7968 |
| C | -0.3585 | 7.7803  | 12.5031 |
| H | 0.452   | 7.8726  | 12.0349 |
| C | -6.5816 | 7.5493  | 19.9255 |
| C | 0.6034  | 3.4059  | 17.3231 |
| H | 0.9488  | 3.3791  | 16.4496 |
| C | 7.0151  | -0.6961 | 16.4993 |
| C | 5.4444  | -4.1354 | 12.1704 |
| C | -4.7577 | 9.8896  | 12.065  |
| C | 1.9877  | 4.1289  | 13.6417 |

|   |         |         |         |
|---|---------|---------|---------|
| H | 2.928   | 4.1036  | 13.6298 |
| C | 3.4628  | -2.2151 | 13.8891 |
| C | 5.9821  | 2.1216  | 20.0931 |
| H | 5.9074  | 2.6248  | 20.8834 |
| C | -8.9633 | 7.2635  | 20.3416 |
| C | 1.2863  | -2.0363 | 13.4213 |
| H | 0.3926  | -2.198  | 13.1807 |
| C | -5.2473 | 11.0951 | 11.5203 |
| H | -5.7304 | 11.077  | 10.7142 |
| C | 5.1622  | -5.1453 | 14.3612 |
| C | -7.7602 | 7.8808  | 20.5965 |
| H | -7.7306 | 8.5553  | 21.2504 |
| C | 7.8039  | -1.5351 | 15.7223 |
| H | 8.7352  | -1.6046 | 15.8234 |
| C | 2.3024  | -2.9106 | 13.3911 |
| H | 2.266   | -3.8042 | 13.0994 |
| C | -9.0107 | 6.3058  | 19.365  |
| H | -9.8308 | 5.8868  | 19.1755 |
| C | -3.1186 | 11.1943 | 15.2449 |
| H | -3.5797 | 10.6304 | 15.8857 |
| H | -3.108  | 12.1089 | 15.5683 |
| H | -2.2082 | 10.8799 | 15.1335 |
| C | -5.3329 | 8.2868  | 20.2033 |
| H | -4.6301 | 7.6577  | 20.4332 |
| H | -5.4744 | 8.8977  | 20.942  |
| H | -5.0708 | 8.7876  | 19.4142 |
| C | 9.4305  | -1.0582 | 18.7169 |
| C | 5.823   | -5.3853 | 11.6821 |
| H | 6.0516  | -5.4665 | 10.775  |
| C | 11.228  | 0.681   | 17.5264 |
| H | 11.8301 | 1.2763  | 17.1189 |
| C | -7.9162 | 4.9091  | 17.5502 |
| H | -7.6121 | 5.301   | 16.7153 |
| H | -8.832  | 4.6058  | 17.4487 |
| H | -7.3492 | 4.1569  | 17.7788 |
| C | 5.8718  | -6.4965 | 12.475  |
| C | 4.8099  | -5.0501 | 15.8282 |
| H | 5.4424  | -4.4658 | 16.2747 |
| H | 4.8483  | -5.9334 | 16.2273 |
| H | 3.9145  | -4.6907 | 15.9228 |
| C | 5.5362  | -6.3696 | 13.8038 |
| H | 5.5607  | -7.1316 | 14.3536 |
| C | 9.3775  | 1.9937  | 16.472  |

|   |          |         |         |
|---|----------|---------|---------|
| H | 8.9356   | 1.6411  | 15.6831 |
| H | 10.1292  | 2.5446  | 16.2007 |
| H | 8.7507   | 2.5304  | 16.9808 |
| C | -5.0237  | 8.5898  | 11.3429 |
| H | -5.6964  | 8.7324  | 10.6589 |
| H | -5.3433  | 7.9281  | 11.977  |
| H | -4.2047  | 8.2749  | 10.9318 |
| C | -5.5648  | 13.5703 | 11.5503 |
| H | -6.4883  | 13.6916 | 11.8194 |
| H | -5.513   | 13.5248 | 10.5825 |
| H | -5.0347  | 14.3192 | 11.8668 |
| C | 11.7193  | -0.3256 | 18.2999 |
| C | 8.4708   | -2.0142 | 19.4018 |
| H | 8.2434   | -2.7341 | 18.7929 |
| H | 7.665    | -1.5368 | 19.6538 |
| H | 8.8916   | -2.3807 | 20.1944 |
| C | 10.8049  | -1.194  | 18.9027 |
| H | 11.125   | -1.8893 | 19.4484 |
| C | 5.4398   | -2.928  | 11.25   |
| H | 4.5321   | -2.7447 | 10.9608 |
| H | 5.9948   | -3.11   | 10.4748 |
| H | 5.7899   | -2.1577 | 11.7239 |
| C | -10.2408 | 7.6858  | 21.0697 |
| H | -10.1884 | 7.4164  | 21.9993 |
| H | -11.0069 | 7.2609  | 20.652  |
| H | -10.3388 | 8.65    | 21.0171 |
| C | 6.3433   | -7.8294 | 11.9241 |
| H | 5.5828   | -8.3239 | 11.5794 |
| H | 6.7658   | -8.3411 | 12.6326 |
| H | 6.981    | -7.6772 | 11.2106 |
| C | 13.2166  | -0.5381 | 18.5051 |
| H | 13.5318  | -1.2273 | 17.8996 |
| H | 13.3807  | -0.8134 | 19.4211 |
| H | 13.6886  | 0.2898  | 18.327  |

**Table S4.** Optimized coordinates of  $1\cdot4\text{H}^+-1$ .

\* Sum of imaginary frequencies = 0

| atom | X       | Y        | Z        |
|------|---------|----------|----------|
| N    | 4.41794 | -3.2182  | -0.52649 |
| C    | 5.78388 | -3.56352 | -0.20835 |
| C    | 5.74762 | -4.99041 | 0.1376   |
| C    | 4.45476 | -5.42899 | 0.04205  |
| C    | 3.6245  | -4.30743 | -0.36905 |

|   |          |          |          |
|---|----------|----------|----------|
| C | 1.60881  | -3.50989 | -1.62474 |
| C | 2.17358  | -4.28396 | -0.55901 |
| C | 1.35779  | -4.99403 | 0.29894  |
| C | -0.06367 | -4.92112 | 0.16356  |
| C | -0.62229 | -4.11871 | -0.86638 |
| C | 0.2496   | -3.43354 | -1.77231 |
| C | -0.93683 | -5.62835 | 1.05012  |
| C | -2.29712 | -5.50975 | 0.93272  |
| C | -2.85973 | -4.66569 | -0.07867 |
| C | -2.04201 | -4.00006 | -0.96938 |
| C | -4.31703 | -4.52007 | -0.12045 |
| C | -5.32082 | -5.55546 | 0.06505  |
| C | -6.55634 | -4.96908 | -0.0014  |
| C | -6.37907 | -3.52893 | -0.22285 |
| N | -4.94972 | -3.33465 | -0.30601 |
| C | -6.08336 | -0.63937 | -1.47706 |
| C | -5.96839 | 0.78089  | -1.40641 |
| C | -6.77679 | 1.34078  | -0.43927 |
| S | -7.72521 | 0.1206   | 0.33427  |
| C | -6.97481 | -1.15587 | -0.56076 |
| C | -7.32821 | -2.53958 | -0.29658 |
| C | -6.90087 | 2.73671  | -0.05738 |
| N | -4.42046 | 3.09723  | 0.03585  |
| C | -5.79585 | 3.53622  | 0.09861  |
| C | -5.72718 | 4.97794  | 0.36302  |
| C | -4.41064 | 5.34268  | 0.44921  |
| C | -3.59719 | 4.15137  | 0.26118  |
| C | -1.54319 | 2.92408  | 0.97802  |
| C | -2.13789 | 4.04628  | 0.31281  |
| C | -1.34728 | 5.02211  | -0.25815 |
| C | 0.07799  | 4.90719  | -0.21561 |
| C | 0.66484  | 3.78707  | 0.43063  |
| C | -0.18116 | 2.80312  | 1.03704  |
| C | 0.92722  | 5.89302  | -0.81111 |
| C | 2.29081  | 5.75685  | -0.77331 |
| C | 2.88248  | 4.61797  | -0.13843 |
| C | 2.08671  | 3.66032  | 0.45907  |
| C | 4.34066  | 4.48954  | -0.14427 |
| C | 5.32886  | 5.55398  | -0.05887 |
| C | 6.57387  | 4.98579  | -0.08791 |
| C | 6.41902  | 3.53243  | -0.21467 |
| N | 4.99273  | 3.30346  | -0.24333 |
| C | -8.75036 | -2.83996 | -0.09237 |

|   |           |          |          |
|---|-----------|----------|----------|
| C | -8.25122  | 3.26829  | 0.16025  |
| C | -9.23207  | -3.27311 | 1.16796  |
| C | -10.59283 | -3.55241 | 1.32888  |
| C | -11.48999 | -3.41105 | 0.26014  |
| C | -11.00971 | -2.97984 | -0.9873  |
| C | -9.65638  | -2.69148 | -1.17503 |
| C | -9.14715  | 3.38349  | -0.93249 |
| C | -10.42716 | 3.9067   | -0.72552 |
| C | -10.84202 | 4.31381  | 0.55098  |
| C | -9.9552   | 4.1898   | 1.63282  |
| C | -8.66943  | 3.67428  | 1.45395  |
| C | -8.32462  | -3.43173 | 2.33812  |
| C | -9.19177  | -2.24431 | -2.51742 |
| C | -12.93576 | -3.70582 | 0.43657  |
| C | -7.76994  | 3.55185  | 2.6347   |
| C | -8.75473  | 2.96952  | -2.30788 |
| C | -12.20881 | 4.85592  | 0.76541  |
| C | 6.19067   | 0.70937  | -1.60535 |
| C | 6.05478   | -0.71131 | -1.59218 |
| C | 6.76319   | -1.31415 | -0.57455 |
| S | 7.66129   | -0.12984 | 0.31636  |
| C | 7.01738   | 1.18007  | -0.60675 |
| C | 7.38071   | 2.55811  | -0.31308 |
| C | 6.85781   | -2.7096  | -0.19449 |
| C | 8.80066   | 2.8728   | -0.13306 |
| C | 8.17413   | -3.18719 | 0.25797  |
| C | 9.29024   | 3.3325   | 1.11633  |
| C | 10.65002  | 3.62219  | 1.26104  |
| C | 11.53988  | 3.47024  | 0.18687  |
| C | 11.05202  | 3.0182   | -1.04968 |
| C | 9.69888   | 2.71855  | -1.22146 |
| C | 9.20925   | -3.37708 | -0.6948  |
| C | 10.45889  | -3.83196 | -0.27376 |
| C | 10.70833  | -4.10235 | 1.08324  |
| C | 9.68347   | -3.915   | 2.0199   |
| C | 8.41867   | -3.46289 | 1.62281  |
| C | 8.39079   | 3.50949  | 2.28997  |
| C | 9.22125   | 2.26117  | -2.55554 |
| C | 12.98542  | 3.76906  | 0.35702  |
| C | 7.37547   | -3.26834 | 2.66733  |
| C | 8.9647    | -3.113   | -2.13942 |
| C | 12.05043  | -4.57975 | 1.50756  |
| H | 4.11712   | -2.27989 | -0.79735 |

|   |           |          |          |
|---|-----------|----------|----------|
| H | 6.63304   | -5.5547  | 0.41084  |
| H | 4.07286   | -6.4257  | 0.22024  |
| H | 2.27219   | -3.00116 | -2.33008 |
| H | 1.77831   | -5.60945 | 1.10345  |
| H | -0.1919   | -2.85262 | -2.58759 |
| H | -0.4975   | -6.26577 | 1.82499  |
| H | -2.96771  | -6.04823 | 1.61034  |
| H | -2.45696  | -3.38231 | -1.77278 |
| H | -5.08556  | -6.60109 | 0.2158   |
| H | -7.52979  | -5.44061 | 0.08149  |
| H | -4.50872  | -2.4277  | -0.46957 |
| H | -5.5297   | -1.22708 | -2.20812 |
| H | -5.31827  | 1.34114  | -2.07743 |
| H | -4.14179  | 2.12625  | -0.12972 |
| H | -6.60724  | 5.60556  | 0.45341  |
| H | -4.00129  | 6.32722  | 0.63282  |
| H | -2.19179  | 2.18083  | 1.45063  |
| H | -1.79131  | 5.89147  | -0.7581  |
| H | 0.28452   | 1.95676  | 1.55062  |
| H | 0.4667    | 6.76024  | -1.29694 |
| H | 2.94148   | 6.50919  | -1.23123 |
| H | 2.5204    | 2.79557  | 0.9732   |
| H | 5.07786   | 6.60363  | 0.02249  |
| H | 7.53995   | 5.47742  | -0.04906 |
| H | 4.57008   | 2.37303  | -0.29397 |
| H | -10.96224 | -3.88443 | 2.30068  |
| H | -11.70642 | -2.86976 | -1.82005 |
| H | -11.1136  | 3.99942  | -1.56883 |
| H | -10.27877 | 4.49955  | 2.62811  |
| H | -8.8482   | -3.2805  | 3.29774  |
| H | -7.47631  | -2.73517 | 2.3486   |
| H | -7.90614  | -4.45214 | 2.38571  |
| H | -8.14529  | -2.49486 | -2.73898 |
| H | -9.78825  | -2.68368 | -3.33501 |
| H | -9.29211  | -1.15099 | -2.62896 |
| H | -13.18525 | -4.11592 | 1.42669  |
| H | -13.55296 | -2.8001  | 0.30841  |
| H | -13.30395 | -4.43391 | -0.30557 |
| H | -7.15144  | 2.6439   | 2.63027  |
| H | -7.08221  | 4.41125  | 2.70985  |
| H | -8.32518  | 3.5309   | 3.58796  |
| H | -7.67514  | 3.01261  | -2.50517 |
| H | -9.23024  | 3.59172  | -3.08505 |

|   |           |          |          |
|---|-----------|----------|----------|
| H | -9.07611  | 1.93397  | -2.51594 |
| H | -12.22637 | 5.70117  | 1.47197  |
| H | -12.68951 | 5.21013  | -0.15926 |
| H | -12.88001 | 4.08843  | 1.18977  |
| H | 5.70235   | 1.33445  | -2.35156 |
| H | 5.46301   | -1.24055 | -2.33685 |
| H | 11.02631  | 3.97174  | 2.22401  |
| H | 11.74151  | 2.90142  | -1.88755 |
| H | 11.25586  | -3.98205 | -1.00403 |
| H | 9.87138   | -4.12278 | 3.07454  |
| H | 7.56683   | 2.78534  | 2.33747  |
| H | 8.92805   | 3.41589  | 3.24921  |
| H | 7.9376    | 4.51585  | 2.29965  |
| H | 8.20867   | 2.6079   | -2.80651 |
| H | 9.2107    | 1.1599   | -2.62008 |
| H | 9.87213   | 2.60307  | -3.37779 |
| H | 13.19126  | 4.47572  | 1.1757   |
| H | 13.5551   | 2.8519   | 0.59004  |
| H | 13.44546  | 4.19516  | -0.54853 |
| H | 6.4294    | -2.84367 | 2.31091  |
| H | 7.7306    | -2.59507 | 3.46822  |
| H | 7.12528   | -4.22088 | 3.16685  |
| H | 8.05364   | -3.60626 | -2.51161 |
| H | 8.85707   | -2.03611 | -2.34783 |
| H | 9.78628   | -3.46463 | -2.78507 |
| H | 12.8383   | -3.84346 | 1.27495  |
| H | 12.12512  | -4.78746 | 2.58547  |
| H | 12.33936  | -5.50939 | 0.98875  |

**Table S5.** Optimized coordinates of **1·4H<sup>+</sup>·2**.

\* Sum of imaginary frequencies = 0

| atom | X      | Y      | Z       |
|------|--------|--------|---------|
| N    | 5.5267 | 3.823  | -1.9334 |
| C    | 6.617  | 4.1917 | -1.3095 |
| C    | 6.1686 | 4.9113 | -0.2629 |
| C    | 4.8339 | 4.9946 | -0.3261 |
| C    | 4.425  | 4.2674 | -1.3789 |
| C    | 2.8931 | 3.1091 | -2.7353 |
| C    | 3.1516 | 3.9604 | -1.7225 |
| C    | 2.0735 | 4.4015 | -1.0367 |
| C    | 0.8261 | 3.9372 | -1.2582 |
| C    | 0.62   | 3.0171 | -2.2145 |

|   |         |         |         |
|---|---------|---------|---------|
| C | 1.6592  | 2.6443  | -2.9789 |
| C | -0.2386 | 4.315   | -0.5269 |
| C | -1.4443 | 3.7391  | -0.6864 |
| C | -1.6475 | 2.7462  | -1.5752 |
| C | -0.5917 | 2.4517  | -2.3631 |
| C | -2.7964 | 2.0308  | -1.6285 |
| C | -2.9649 | 0.9221  | -2.3665 |
| C | -4.1453 | 0.3899  | -2.0483 |
| C | -4.7323 | 1.1607  | -1.1179 |
| N | -3.9084 | 2.1741  | -0.9439 |
| C | -7.8744 | -0.3115 | 0.1219  |
| C | -8.3833 | -1.5271 | -0.1005 |
| C | -7.6597 | -2.2234 | -0.9953 |
| S | -6.4988 | -1.3729 | -1.31   |
| C | -6.7437 | -0.1277 | -0.5776 |
| C | -5.9264 | 0.956   | -0.5017 |
| C | -7.8128 | -3.5588 | -1.2509 |
| N | -5.5224 | -3.822  | -1.9629 |
| C | -6.6143 | -4.1932 | -1.3432 |
| C | -6.1686 | -4.917  | -0.2984 |
| C | -4.8337 | -5      | -0.3585 |
| C | -4.4222 | -4.2686 | -1.4074 |
| C | -2.8869 | -3.1049 | -2.7551 |
| C | -3.1479 | -3.9602 | -1.7464 |
| C | -2.0715 | -4.4041 | -1.0597 |
| C | -0.8236 | -3.9389 | -1.2761 |
| C | -0.6151 | -3.015  | -2.2282 |
| C | -1.6523 | -2.6392 | -2.9937 |
| C | 0.2392  | -4.3196 | -0.5436 |
| C | 1.4453  | -3.7432 | -0.6976 |
| C | 1.6509  | -2.7468 | -1.582  |
| C | 0.597   | -2.449  | -2.3714 |
| C | 2.7998  | -2.0311 | -1.6295 |
| C | 2.9702  | -0.9194 | -2.3626 |
| C | 4.1498  | -0.3885 | -2.0392 |
| C | 4.7344  | -1.1631 | -1.1105 |
| N | 3.91    | -2.1772 | -0.9426 |
| C | -6.3368 | 1.946   | 0.3211  |
| C | -8.9945 | -4.2123 | -1.0356 |
| C | -5.71   | 2.1569  | 1.5006  |
| C | -6.1374 | 3.1537  | 2.296   |
| C | -7.1646 | 3.9456  | 1.9526  |
| C | -7.7738 | 3.7114  | 0.7804  |

|   |          |         |         |
|---|----------|---------|---------|
| C | -7.3824  | 2.7222  | -0.0419 |
| C | -10.1825 | -3.5447 | -1.1316 |
| C | -11.3451 | -4.0986 | -0.7396 |
| C | -11.4314 | -5.3675 | -0.3309 |
| C | -10.321  | -6.0912 | -0.5036 |
| C | -9.1462  | -5.5627 | -0.9021 |
| C | -4.586   | 1.2768  | 2.0166  |
| C | -8.1035  | 2.5692  | -1.3683 |
| C | -7.6413  | 5.0638  | 2.8488  |
| C | -8.1246  | -6.6476 | -1.2233 |
| C | -10.395  | -2.1989 | -1.8271 |
| C | -12.7407 | -5.9932 | 0.0856  |
| C | 7.8734   | 0.3041  | 0.1432  |
| C | 8.3828   | 1.5206  | -0.073  |
| C | 7.6614   | 2.2206  | -0.9668 |
| S | 6.5013   | 1.3713  | -1.2879 |
| C | 6.7444   | 0.1232  | -0.5599 |
| C | 5.9269   | -0.9608 | -0.4904 |
| C | 7.8152   | 3.557   | -1.2166 |
| C | 6.3352   | -1.9541 | 0.3294  |
| C | 8.9964   | 4.2096  | -0.9958 |
| C | 5.7055   | -2.1697 | 1.5065  |
| C | 6.1309   | -3.1697 | 2.299   |
| C | 7.1588   | -3.9602 | 1.9551  |
| C | 7.7711   | -3.7214 | 0.7854  |
| C | 7.3817   | -2.7289 | -0.0339 |
| C | 10.1846  | 3.5423  | -1.0914 |
| C | 11.3462  | 4.0946  | -0.6943 |
| C | 11.4315  | 5.3618  | -0.2803 |
| C | 10.3214  | 6.0863  | -0.4527 |
| C | 9.1477   | 5.5594  | -0.8564 |
| C | 4.5802   | -1.2917 | 2.0232  |
| C | 8.1062   | -2.5706 | -1.3579 |
| C | 7.6334   | -5.082  | 2.848   |
| C | 8.127    | 6.6456  | -1.1758 |
| C | 10.3989  | 2.1994  | -1.7918 |
| C | 12.7398  | 5.9857  | 0.1421  |
| H | 5.5632   | 3.3106  | -2.8236 |
| H | 6.7494   | 5.267   | 0.5989  |
| H | 4.2194   | 5.4883  | 0.4366  |
| H | 3.6863   | 2.6927  | -3.3749 |
| H | 2.2002   | 5.1122  | -0.205  |
| H | 1.5294   | 1.8998  | -3.7837 |

|   |          |         |         |
|---|----------|---------|---------|
| H | -0.122   | 5.0719  | 0.2684  |
| H | -2.2422  | 4.0606  | 0.0026  |
| H | -0.6644  | 1.6752  | -3.139  |
| H | -2.2811  | 0.4402  | -3.0748 |
| H | -4.4797  | -0.5395 | -2.5153 |
| H | -4.0788  | 2.9546  | -0.2984 |
| H | -8.3224  | 0.3882  | 0.8419  |
| H | -9.2478  | -1.8894 | 0.4735  |
| H | -5.5567  | -3.3059 | -2.851  |
| H | -6.7517  | -5.2761 | 0.5604  |
| H | -4.2213  | -5.4968 | 0.4038  |
| H | -3.6783  | -2.6859 | -3.3951 |
| H | -2.2004  | -5.1182 | -0.2312 |
| H | -1.5206  | -1.8914 | -3.7952 |
| H | 0.1207   | -5.0796 | 0.2484  |
| H | 2.2415   | -4.0674 | -0.0079 |
| H | 0.6717   | -1.6694 | -3.144  |
| H | 2.2883   | -0.4347 | -3.0707 |
| H | 4.4853   | 0.5428  | -2.5016 |
| H | 4.0788   | -2.9602 | -0.2998 |
| H | -5.6357  | 3.32    | 3.2632  |
| H | -8.6177  | 4.3584  | 0.4891  |
| H | -12.2781 | -3.513  | -0.7957 |
| H | -10.4055 | -7.1785 | -0.3364 |
| H | -4.5485  | 0.2775  | 1.5305  |
| H | -3.601   | 1.7751  | 1.8706  |
| H | -4.7058  | 1.0747  | 3.1051  |
| H | -7.45    | 2.1609  | -2.1706 |
| H | -8.4679  | 3.5489  | -1.7514 |
| H | -8.9876  | 1.9018  | -1.2569 |
| H | -7.0596  | 5.1345  | 3.7948  |
| H | -7.5492  | 6.0428  | 2.3255  |
| H | -8.7095  | 4.91    | 3.1243  |
| H | -7.3733  | -6.3591 | -1.9873 |
| H | -7.6519  | -7.083  | -0.3155 |
| H | -8.6214  | -7.5066 | -1.7306 |
| H | -9.5493  | -1.8607 | -2.4623 |
| H | -10.7292 | -1.3864 | -1.1445 |
| H | -11.2147 | -2.3054 | -2.5753 |
| H | -12.822  | -7.0497 | -0.2557 |
| H | -12.8243 | -5.9783 | 1.1961  |
| H | -13.6171 | -5.4503 | -0.3343 |
| H | 8.3195   | -0.3985 | 0.8616  |

|   |         |         |         |
|---|---------|---------|---------|
| H | 9.2458  | 1.8806  | 0.5046  |
| H | 5.6267  | -3.3399 | 3.2643  |
| H | 8.6156  | -4.3672 | 0.4935  |
| H | 12.2795 | 3.5093  | -0.7504 |
| H | 10.4056 | 7.1729  | -0.281  |
| H | 4.5439  | -0.2904 | 1.541   |
| H | 3.5955  | -1.7893 | 1.8726  |
| H | 4.6972  | -1.094  | 3.1128  |
| H | 7.4548  | -2.1591 | -2.1603 |
| H | 8.9901  | -1.9036 | -1.2416 |
| H | 8.4716  | -3.5488 | -1.744  |
| H | 7.0535  | -5.1521 | 3.7952  |
| H | 8.7027  | -4.9328 | 3.1216  |
| H | 7.5363  | -6.0595 | 2.3228  |
| H | 7.3776  | 6.3601  | -1.9428 |
| H | 7.6519  | 7.0773  | -0.2674 |
| H | 8.625   | 7.5066  | -1.6784 |
| H | 9.5548  | 1.8637  | -2.4305 |
| H | 10.7312 | 1.3841  | -1.1117 |
| H | 11.2204 | 2.3089  | -2.5375 |
| H | 13.6171 | 5.4452  | -0.279  |
| H | 12.8212 | 5.9649  | 1.2527  |
| H | 12.8215 | 7.0441  | -0.1935 |

**Table S6.** Optimized coordinates of **1·4H<sup>+</sup>-3**.

\* Sum of imaginary frequencies = 0

| atom | X        | Y        | Z        |
|------|----------|----------|----------|
| S    | 5.96026  | -0.20564 | -0.06692 |
| S    | -5.93453 | 0.02548  | -0.07668 |
| N    | 4.47733  | 1.95703  | -1.16121 |
| N    | 4.52912  | -2.17087 | 1.26629  |
| N    | -4.70844 | 2.25801  | 1.16283  |
| N    | -4.31448 | -1.89117 | -1.48833 |
| C    | 2.1529   | 2.65577  | -0.89437 |
| C    | -7.01    | -1.16866 | -0.70699 |
| C    | 0.68716  | -2.28541 | -0.5695  |
| C    | 3.50952  | 2.80677  | -1.43818 |
| C    | 7.15144  | 0.73217  | -0.89787 |
| C    | 5.27746  | 3.65099  | -2.54676 |
| H    | 5.9711   | 4.19861  | -3.16363 |
| C    | 0.47287  | -2.25406 | -1.95714 |
| H    | 1.32905  | -2.28214 | -2.62283 |

|   |          |          |          |
|---|----------|----------|----------|
| C | -1.90712 | -2.18124 | -1.64576 |
| C | 7.16709  | -1.23945 | 0.61016  |
| C | 3.97221  | 3.87605  | -2.31196 |
| H | 3.33933  | 4.65626  | -2.70239 |
| C | -6.68934 | -1.98308 | -1.84256 |
| C | 6.9135   | -2.23162 | 1.62067  |
| C | 0.02302  | 3.64065  | -0.25143 |
| C | 8.04706  | 2.61215  | -2.26418 |
| C | 5.6507   | -2.60975 | 1.97073  |
| C | 1.3293   | 3.74298  | -0.79192 |
| H | 1.66928  | 4.72738  | -1.09396 |
| C | -0.46107 | -2.23764 | 0.29137  |
| C | -7.85195 | -2.58267 | -2.5874  |
| C | -3.2737  | -2.24425 | -2.1953  |
| C | 2.13687  | -2.48945 | 1.36344  |
| C | -5.71019 | 3.79347  | 2.61051  |
| H | -6.4596  | 4.21705  | 3.259    |
| C | -2.5553  | 3.36925  | 0.82255  |
| C | 6.86087  | 1.8956   | -1.675   |
| C | -6.99568 | 1.77167  | 1.84489  |
| C | 5.61368  | 2.45677  | -1.80319 |
| C | 8.10138  | -2.81046 | 2.32548  |
| C | -3.90778 | 3.27528  | 1.39827  |
| C | -2.03647 | 4.6353   | 0.4849   |
| H | -2.64424 | 5.51938  | 0.63616  |
| C | 8.42733  | -0.87855 | 0.14988  |
| H | 9.32141  | -1.40446 | 0.45208  |
| C | 9.83045  | -2.65414 | 3.96345  |
| H | 10.3128  | -2.10469 | 4.76696  |
| C | 1.95925  | -2.38406 | 0.00445  |
| H | 2.79691  | -2.46232 | -0.68132 |
| C | 8.71345  | -2.07966 | 3.34906  |
| C | -0.78882 | 4.76405  | -0.06359 |
| H | -0.41811 | 5.74233  | -0.34751 |
| C | -5.8656  | 2.5647   | 1.89224  |
| C | 5.2207   | -3.4272  | 3.09017  |
| H | 5.89464  | -3.87781 | 3.80164  |
| C | 10.33713 | -3.87255 | 3.5819   |
| C | 3.48266  | -2.6692  | 1.89662  |
| C | -0.78806 | -2.22652 | -2.48084 |
| H | -0.9178  | -2.22728 | -3.55588 |
| C | 1.00189  | -2.44706 | 2.20888  |
| H | 1.13402  | -2.51349 | 3.28157  |

|   |          |          |          |
|---|----------|----------|----------|
| C | -1.73456 | -2.16952 | -0.28397 |
| H | -2.5734  | -2.1821  | 0.40372  |
| C | -0.45561 | 2.36002  | 0.13302  |
| C | 8.41873  | 0.2123   | -0.69978 |
| H | 9.30368  | 0.64693  | -1.13976 |
| C | -1.76627 | 2.25146  | 0.61408  |
| H | -2.1264  | 1.26895  | 0.90456  |
| C | -8.34106 | 1.6453   | 3.95909  |
| C | -8.2001  | 2.142    | 2.66667  |
| C | -8.22942 | -1.14295 | -0.05208 |
| H | -9.036   | -1.81657 | -0.30056 |
| C | 8.55208  | 2.21334  | -3.50321 |
| C | 1.6863   | 1.41326  | -0.45295 |
| H | 2.32843  | 0.54003  | -0.51607 |
| C | 3.87175  | -3.43882 | 3.06885  |
| H | 3.17824  | -3.91665 | 3.74146  |
| C | 8.63407  | 3.63452  | -1.53121 |
| C | 0.41744  | 1.25829  | 0.01959  |
| H | 0.06739  | 0.28141  | 0.32708  |
| C | -7.1486  | 0.61812  | 0.99951  |
| C | -8.20732 | -3.91223 | -2.37543 |
| C | 8.59621  | -4.02715 | 1.91674  |
| C | -0.24636 | -2.31622 | 1.68512  |
| H | -1.10506 | -2.28229 | 2.34787  |
| C | -5.42826 | -2.22896 | -2.26758 |
| C | -4.49558 | 4.25567  | 2.28469  |
| H | -3.98984 | 5.1504   | 2.61096  |
| C | 10.29087 | 3.91467  | -3.29298 |
| C | -3.64716 | -2.80283 | -3.48673 |
| H | -2.94565 | -3.14595 | -4.22954 |
| C | 9.73375  | -4.55133 | 2.56549  |
| H | 10.12253 | -5.50852 | 2.23508  |
| C | -8.59913 | -1.77837 | -3.46735 |
| C | 9.76357  | 4.25493  | -2.06837 |
| H | 10.23595 | 5.04268  | -1.48796 |
| C | -8.304   | -0.14736 | 0.905    |
| H | -9.17844 | 0.05166  | 1.50672  |
| C | -4.98773 | -2.8125  | -3.51002 |
| H | -5.6553  | -3.14412 | -4.28951 |
| C | 9.69977  | 2.90187  | -3.99869 |
| H | 10.09781 | 2.59815  | -4.96191 |
| C | 8.22039  | -0.7195  | 3.76575  |
| H | 8.40996  | 0.03136  | 2.9924   |

|   |           |          |          |
|---|-----------|----------|----------|
| H | 8.72763   | -0.389   | 4.67361  |
| H | 7.1448    | -0.71827 | 3.96412  |
| C | 8.14882   | 4.0045   | -0.1866  |
| H | 7.11543   | 4.36471  | -0.19545 |
| H | 8.76241   | 4.79619  | 0.24674  |
| H | 8.18038   | 3.15453  | 0.50388  |
| C | -9.20184  | 2.94383  | 2.12125  |
| C | -9.30476  | -4.42637 | -3.06486 |
| H | -9.5815   | -5.46079 | -2.88349 |
| C | -9.49379  | 1.91459  | 4.67635  |
| H | -9.58189  | 1.50363  | 5.67786  |
| C | 7.93602   | 1.09589  | -4.26286 |
| H | 7.92901   | 0.16484  | -3.68734 |
| H | 8.48132   | 0.90474  | -5.1891  |
| H | 6.89668   | 1.31098  | -4.53305 |
| C | -10.03886 | -3.67402 | -3.93715 |
| C | -8.24321  | -0.32925 | -3.70951 |
| H | -8.30965  | 0.2634   | -2.79232 |
| H | -8.92179  | 0.11379  | -4.43952 |
| H | -7.2233   | -0.22213 | -4.09224 |
| C | -9.67782  | -2.36076 | -4.13574 |
| H | -10.24744 | -1.74584 | -4.82611 |
| C | -7.24908  | 0.81466  | 4.57274  |
| H | -6.97952  | -0.0381  | 3.94123  |
| H | -7.55835  | 0.42187  | 5.5428   |
| H | -6.33767  | 1.40047  | 4.72988  |
| C | 7.95903   | -4.81016 | 0.7931   |
| H | 8.54575   | -5.70164 | 0.56656  |
| H | 7.8857    | -4.21861 | -0.12471 |
| H | 6.94694   | -5.13594 | 1.05237  |
| C | 11.55909  | -4.44563 | 4.2641   |
| H | 12.3896   | -3.73367 | 4.24655  |
| H | 11.8888   | -5.36666 | 3.78046  |
| H | 11.35204  | -4.6709  | 5.31538  |
| C | -10.50188 | 2.67461  | 4.16737  |
| C | -9.06267  | 3.54151  | 0.73292  |
| H | -8.92492  | 2.76848  | -0.0288  |
| H | -8.20216  | 4.21496  | 0.67504  |
| H | -9.95351  | 4.11415  | 0.47129  |
| C | -10.34297 | 3.19599  | 2.88031  |
| H | -11.12477 | 3.81599  | 2.45275  |
| C | -7.44788  | -4.78592 | -1.39315 |
| H | -6.44535  | -5.02499 | -1.76077 |

|   |           |          |          |
|---|-----------|----------|----------|
| H | -7.9756   | -5.72757 | -1.23497 |
| H | -7.33263  | -4.29614 | -0.42226 |
| C | 11.55539  | 4.59028  | -3.82685 |
| H | 11.53951  | 5.66605  | -3.63514 |
| H | 11.66248  | 4.42972  | -4.90089 |
| H | 12.44347  | 4.18165  | -3.33387 |
| C | -11.2618  | -4.24888 | -4.62735 |
| H | -11.35618 | -3.86989 | -5.64776 |
| H | -12.17246 | -3.96633 | -4.08823 |
| H | -11.22246 | -5.33938 | -4.66343 |
| C | -11.78622 | 2.94968  | 4.94452  |
| H | -12.63989 | 2.46504  | 4.46071  |
| H | -11.99731 | 4.02181  | 4.98248  |
| H | -11.7163  | 2.57454  | 5.96715  |
| H | -4.47453  | 1.49436  | 0.54902  |
| H | -4.31667  | -1.6863  | -0.4988  |
| H | 4.49573   | -1.88306 | 0.29787  |
| H | 4.42018   | 1.29976  | -0.3984  |
